# Supplementary material for: Litter biomass as a driver of soil VOC fluxes in a Mediterranean forest
Source: Copernicus journal article supplement (doi:10.5194/egusphere-2025-54), 2025-01-23
Supplement: Supplementary file 1 [file egusphere-2025-54-supplement.zip]

## Sheet: Sheet1
	date	masses	actino	gram_neg	gram_pos	AM_fungi	euk	temperature	humidity	formaldehyde	litterRH	methanol	acetonitrile	acetaldehyde	formic acid	ethanol	propanenitrile	acrolein	acetone	acetic acid	isoprene	MACR/MVK/ISOPOOH	propanoic acid	toluene	1H-pyrrole-2,5-dione	CHC acid	monoterpenes	creosol	sesquiterpenes	lindestrene	dibutyl.phthalate	chamber
1	2023-05-23 15:00:00	0	12.94	26.32	82.24	7.85	0.53	20.8057	97.0742	#N/A	0	#N/A	#N/A	#N/A	#N/A	#N/A	#N/A	#N/A	#N/A	#N/A	#N/A	#N/A	#N/A	#N/A	#N/A	#N/A	#N/A	#N/A	#N/A	#N/A	#N/A	Soil
2	2023-05-23 16:00:00	0	12.94	26.32	82.24	7.85	0.53	21.264	96.8486	#N/A	0	#N/A	#N/A	#N/A	#N/A	#N/A	#N/A	#N/A	#N/A	#N/A	#N/A	#N/A	#N/A	#N/A	#N/A	#N/A	#N/A	#N/A	#N/A	#N/A	#N/A	Soil
3	2023-05-23 17:00:00	0	12.94	26.32	82.24	7.85	0.53	19.3964	98.7977	-0.0796	0	-1.64621	-0.02903	0.327397	-0.155466	-0.0635196	-0.00472818	-0.0253948	-0.357725	-0.205163	-0.265026	-0.0722578	-0.0341269	-0.0338464	-0.000582526	-0.00823893	0.0828913	0.00320125	0.00310139	-0.00176836	0.00162359	Soil
4	2023-05-23 18:00:00	0	12.94	26.32	82.24	7.85	0.53	17.5196	100.29	-0.0664839	0	-1.51809	-0.0339744	0.152181	-0.103951	-0.0707064	-0.00693489	0.0223165	-0.390066	-0.170854	-0.116628	-0.0473085	-0.0299359	-0.0275049	-0.000370937	-0.00492219	0.0325382	0.00240321	0.00211205	-0.00149275	0.000925718	Soil
5	2023-05-23 19:00:00	0	12.94	26.32	82.24	7.85	0.53	15.8595	101.368	-0.038191	0	-0.580703	-0.0325143	0.167916	-0.0620249	-0.0610004	-0.00511828	0.00658109	-0.283917	-0.103137	-0.0625421	-0.0181273	-0.0172479	-0.0260298	-0.000242273	-0.00493343	0.0162941	-0.000729426	9.96758e-05	-0.00121624	0.00142521	Soil
6	2023-05-23 20:00:00	0	12.94	26.32	82.24	7.85	0.53	14.9253	101.068	-0.0328849	0	-0.714882	-0.0312951	0.157355	-0.0586298	-0.0531008	-0.00512795	-0.0465996	-0.254969	-0.124357	-0.0556811	-0.0156656	-0.0193482	-0.0209797	-0.000246209	-0.00361116	0.014895	0.00185458	-0.000658894	-0.000964802	0.0013215	Soil
7	2023-05-23 21:00:00	0	12.94	26.32	82.24	7.85	0.53	14.2239	100.149	-0.0262896	0	-0.484282	-0.0297154	0.153819	-0.0513938	-0.0487086	-0.00561513	-0.0203267	-0.192562	-0.116926	-0.0490829	-0.0136631	-0.017621	-0.0172232	-0.000181242	-0.00332629	0.0183205	0.000584314	-0.000275665	-0.00073059	0.00137322	Soil
8	2023-05-23 22:00:00	0	12.94	26.32	82.24	7.85	0.53	13.6478	100.347	-0.0289088	0	-0.399476	-0.0298235	0.146125	-0.0429431	-0.0460848	-0.00301567	0.0292728	-0.180722	-0.103402	-0.044642	-0.01045	-0.0139153	-0.0156775	-0.000107257	-0.00376923	0.0182727	0.000903212	-1.64074e-05	-0.000684158	0.00127933	Soil
9	2023-05-23 23:00:00	0	12.94	26.32	82.24	7.85	0.53	13.606	100.348	-0.0315722	0	-0.702477	-0.033522	0.125261	-0.0554526	-0.0473758	-0.00777895	0.0272806	-0.245308	-0.107201	-0.0470739	-0.0165314	-0.0160572	-0.0176209	-0.000151639	-0.00286719	0.0120234	0.000627542	-0.000134489	-0.000788119	0.00171672	Soil
10	2023-05-24	0	12.94	26.32	82.24	7.85	0.53	13.606	100.403	-0.029845	0	-0.486652	-0.0317809	0.120496	-0.0553023	-0.0466631	-0.00791272	-0.0436715	-0.233031	-0.100275	-0.0406798	-0.014371	-0.0154185	-0.0185913	-0.000347478	-0.0043764	0.0105531	0.000611678	-0.00045615	-0.000747047	0.00139356	Soil
11	2023-05-24 01:00:00	0	12.94	26.32	82.24	7.85	0.53	13.0809	100.39	-0.020306	0	-0.586855	-0.0278686	0.132413	-0.0242951	-0.0379997	-0.00448081	0.0165785	-0.157336	-0.0777771	-0.0297897	-0.00712806	-0.0103548	-0.0136759	-0.000144969	-0.0045925	0.0111947	0.000819564	-0.000451007	-0.000520533	0.00148733	Soil
12	2023-05-24 02:00:00	0	12.94	26.32	82.24	7.85	0.53	12.605	100.743	-0.0206286	0	-0.356322	-0.0254748	0.125494	-0.0414758	-0.0412942	-0.00584438	-0.122458	-0.148569	-0.0732418	-0.030032	-0.00819629	-0.0108059	-0.013282	-0.00013195	-0.00315652	0.0147062	-0.000373145	-0.000344178	-0.000507024	0.00160112	Soil
13	2023-05-24 03:00:00	0	12.94	26.32	82.24	7.85	0.53	12.1791	100.771	-0.0192587	0	-0.421684	-0.0260886	0.124585	-0.0314164	-0.0389154	-0.00614282	0.0153155	-0.133577	-0.0674339	-0.0249591	-0.00573969	-0.00912053	-0.0132919	-9.57834e-05	-0.00372712	0.0105546	-9.70823e-05	-0.000743421	-0.000456543	0.00182955	Soil
14	2023-05-24 04:00:00	0	12.94	26.32	82.24	7.85	0.53	12.104	101.09	-0.0194272	0	-0.413138	-0.0248692	0.124418	-0.0268883	-0.0376539	-0.00426194	0.0229528	-0.130697	-0.0569336	-0.0234772	-0.00466691	-0.00797477	-0.0129981	-5.66284e-05	-0.00302705	0.0122359	0.000266924	-0.000613246	-0.000284429	0.00231468	Soil
15	2023-05-24 05:00:00	0	12.94	26.32	82.24	7.85	0.53	12.5465	100.878	-0.0175735	0	-0.582889	-0.0233589	0.149211	-0.0283143	-0.0355401	-0.00459001	0.00899721	-0.0926347	-0.049734	-0.0436778	-0.00308537	-0.00642523	-0.0132046	-4.86571e-05	-0.00317653	0.00992422	0.000606689	-0.00110793	-0.000437661	0.00326553	Soil
16	2023-05-24 06:00:00	0	12.94	26.32	82.24	7.85	0.53	13.8817	100.523	-0.0286807	0	-0.729173	-0.0273242	0.116433	-0.057387	-0.036477	-0.00608875	-0.0429324	-0.200522	-0.0675584	-0.0566238	-0.0113609	-0.010748	-0.0183956	-0.000155045	-0.00408704	0.00863379	0.00108626	4.16434e-05	-0.000460527	0.00557504	Soil
17	2023-05-24 07:00:00	0	12.94	26.32	82.24	7.85	0.53	15.8512	101.718	-0.0383873	0	-0.875552	-0.0265253	0.150216	-0.0795049	-0.0390685	-0.00404705	0.0233308	-0.272114	-0.0828467	-0.118319	-0.0223979	-0.0157596	-0.0187237	-0.000210809	-0.00491422	0.0157874	0.00336176	0.00025029	-0.00067485	0.00700805	Soil
18	2023-05-24 08:00:00	0	12.94	26.32	82.24	7.85	0.53	19.2962	99.0463	-0.0569763	0	-0.865629	-0.0182393	0.222381	-0.143029	-0.00531433	-0.000136429	-0.010165	-0.276277	-0.1172	-0.145329	-0.0293177	-0.0218073	-0.0139495	-0.000480099	-0.00750204	0.0324423	0.00489281	0.00116048	-0.000905491	0.0084363	Soil
19	2023-05-24 09:00:00	0	12.94	26.32	82.24	7.85	0.53	26.0389	91.627	-0.0626278	0	-0.953871	-0.0210982	0.318991	-0.161775	-0.0227016	-0.00172988	0.00160527	-0.261129	-0.153446	-0.192576	-0.0367409	-0.0256685	-0.0181893	-0.000479479	-0.00543345	0.0427236	0.0114202	0.00352883	-0.00160586	0.0149448	Soil
20	2023-05-24 10:00:00	0	12.94	26.32	82.24	7.85	0.53	23.39	94.881	-0.0721757	0	-1.05678	-0.019008	0.397837	-0.202137	-0.0016766	0.000844034	-0.0152375	-0.272322	-0.163245	-0.191098	-0.0597255	-0.0257103	-0.0161297	-0.000405702	-0.00234113	0.0547091	0.043714	0.00416543	-0.00191382	0.0179157	Soil
21	2023-05-24 11:00:00	0	12.94	26.32	82.24	7.85	0.53	24.7067	93.7328	-0.0756778	0	-1.21172	-0.0295135	0.43569	-0.197345	-0.0194089	-0.000343312	0.0250745	-0.260991	-0.148704	-0.259557	-0.0750569	-0.0230079	-0.0209697	-0.000266029	0.000967333	0.054776	0.0916181	0.00550461	-0.00172901	0.0263857	Soil
22	2023-05-24 12:00:00	0	12.94	26.32	82.24	7.85	0.53	23.99	94.9041	0.0198631	0	0.255639	0.00553786	0.77795	0.0314474	0.00657579	0.00674417	0.0245906	0.229118	0.491867	0.080527	0.0161393	0.0548995	0.00802619	0.000704597	0.00617115	0.0601043	0.0287818	0.00497688	0.00121133	0.0222571	Soil
23	2023-05-24 13:00:00	0	12.94	26.32	82.24	7.85	0.53	20.4054	98.5959	0.0197045	0	0.197733	0.00438541	0.681332	0.0413284	0.00521645	0.00418558	0.0174318	0.15643	0.145737	0.0391588	0.010027	0.0289486	0.00657685	0.000730168	0.00212632	0.0646046	0.0055794	0.00409978	0.00090352	0.0916141	Soil
24	2023-05-24 14:00:00	0	12.94	26.32	82.24	7.85	0.53	18.8254	98.5587	-0.0482522	0	-0.986412	-0.0412904	0.386588	-0.0851821	-0.0472901	-0.00583365	-0.0201296	-0.316869	-0.082008	-0.0994704	-0.0353448	-0.0126568	-0.0202432	-0.000308938	-0.00383786	0.0421057	-1.5985e-05	0.00147455	-0.000839044	0.0996035	Soil
25	2023-05-23 15:00:00	7.42	0	16.68	21.82	0.13	0.53	20.8175	91.8269	#N/A	16.43	#N/A	#N/A	#N/A	#N/A	#N/A	#N/A	#N/A	#N/A	#N/A	#N/A	#N/A	#N/A	#N/A	#N/A	#N/A	#N/A	#N/A	#N/A	#N/A	#N/A	Mass 1
26	2023-05-23 16:00:00	7.42	0	16.68	21.82	0.13	0.53	21.3012	90.2172	#N/A	16.43	#N/A	#N/A	#N/A	#N/A	#N/A	#N/A	#N/A	#N/A	#N/A	#N/A	#N/A	#N/A	#N/A	#N/A	#N/A	#N/A	#N/A	#N/A	#N/A	#N/A	Mass 1
27	2023-05-23 17:00:00	7.42	0	16.68	21.82	0.13	0.53	19.0736	93.6875	-0.0500174	16.43	-1.19785	-0.0243807	0.0142347	-0.141971	-0.0621839	-0.00318534	0.0131113	-0.187433	-0.0596692	-0.126726	-0.0515232	0.0184101	-0.0367849	-0.000607518	-0.0011661	-0.00849634	0.0176332	0.000411639	0.00281879	-0.00021885	Mass 1
28	2023-05-23 18:00:00	7.42	0	16.68	21.82	0.13	0.53	17.0953	96.7622	-0.0319837	16.43	-1.02645	-0.0275681	-0.0116666	-0.0898856	-0.0665721	-0.0047856	0.0439375	-0.162842	0.0154983	-0.0117328	-0.0302703	0.027851	-0.028446	-0.000423131	-0.00167705	-0.00457655	0.00912026	-0.000127112	0.00184966	-0.000109656	Mass 1
29	2023-05-23 19:00:00	7.42	0	16.68	21.82	0.13	0.53	15.634	98.5664	-0.0158557	16.43	-0.381481	-0.0284949	-0.0269665	-0.036688	-0.0600957	-0.00383254	0.017813	-0.161651	0.0325804	-0.00635259	-0.010746	0.0210295	-0.0210589	-0.000323944	-0.00181249	-0.0125672	0.0138407	-0.00125536	0.00123096	-0.000199336	Mass 1
30	2023-05-23 20:00:00	7.42	0	16.68	21.82	0.13	0.53	14.8658	98.7112	-0.0171296	16.43	-0.545237	-0.0287625	-0.0219418	-0.0332863	-0.0532409	-0.00412651	-0.0341261	-0.152699	-0.0547476	-0.0115724	-0.00988192	0.00379089	-0.0192477	-0.000318534	-0.000689354	-0.0148171	0.0141837	-0.00157095	0.00109518	-0.000231119	Mass 1
31	2023-05-23 21:00:00	7.42	0	16.68	21.82	0.13	0.53	14.2304	98.4442	-0.0149658	16.43	-0.354169	-0.0277921	-0.0122377	-0.0265709	-0.0491681	-0.00482878	-0.00429311	-0.108519	-0.0681091	-0.014573	-0.00788258	0.0030075	-0.0154471	-0.000200335	-0.00036082	-0.00730828	0.0143553	-0.00113409	0.00103019	-0.000263249	Mass 1
32	2023-05-23 22:00:00	7.42	0	16.68	21.82	0.13	0.53	13.7626	98.9769	-0.0172971	16.43	-0.277673	-0.0268604	-0.0122801	-0.0238993	-0.0452353	-0.00285989	0.0320057	-0.104488	-0.0659031	-0.0118629	-0.00645821	0.00534708	-0.0144277	-0.000167922	-0.000204976	-0.00655674	0.0133872	-0.000416155	0.00113177	-0.000184868	Mass 1
33	2023-05-23 23:00:00	7.42	0	16.68	21.82	0.13	0.53	13.629	99.2974	-0.0217846	16.43	-0.574601	-0.0304706	-0.0279195	-0.0387036	-0.0464694	-0.00638356	0.0276046	-0.156963	-0.0724537	-0.0153388	-0.0118908	0.00231019	-0.0168073	-0.000259078	0.000539043	-0.0108834	0.0106354	-0.000528406	0.00108691	-0.000276127	Mass 1
34	2023-05-24	7.42	0	16.68	21.82	0.13	0.53	13.6206	99.5284	-0.0192886	16.43	-0.358314	-0.0290445	-0.0222135	-0.0387181	-0.0459654	-0.00688472	-0.0319391	-0.136818	-0.0665075	-0.0103956	-0.00952875	0.00270953	-0.0165181	-0.000278842	-0.00175227	-0.0104372	0.0094295	-0.000496754	0.000875702	-0.000269046	Mass 1
35	2023-05-24 01:00:00	7.42	0	16.68	21.82	0.13	0.53	13.1531	99.42	-0.0121444	16.43	-0.480492	-0.0256351	-0.0094015	-0.0263098	-0.040285	-0.00414016	0.0177018	-0.0795898	-0.0511537	-0.00386713	-0.00364817	0.00294074	-0.0134405	-0.000144667	-0.00197937	-0.0090865	0.00831945	-0.000769331	0.000827364	-0.000195545	Mass 1
36	2023-05-24 02:00:00	7.42	0	16.68	21.82	0.13	0.53	12.6846	99.6374	-0.0131015	16.43	-0.264257	-0.0236134	-0.0127023	-0.0306155	-0.0387911	-0.00577978	-0.105936	-0.0784565	-0.0500507	-0.0073744	-0.00501535	0.0018189	-0.0117764	-0.000145477	-0.00036965	-0.0062829	0.00523901	-0.000799651	0.00072503	-0.000194895	Mass 1
37	2023-05-24 03:00:00	7.42	0	16.68	21.82	0.13	0.53	12.626	99.8341	-0.012629	16.43	-0.331084	-0.0237863	-0.00258574	-0.0204992	-0.0378229	-0.00547703	0.0199954	-0.0684675	-0.0468848	-0.00343095	-0.00349403	0.00235879	-0.0123198	-0.000139475	-0.000991058	-0.00785046	0.00481156	-0.00103818	0.000646464	-0.000285414	Mass 1
38	2023-05-24 04:00:00	7.42	0	16.68	21.82	0.13	0.53	12.2669	100.027	-0.0108639	16.43	-0.327465	-0.023189	-0.000305425	-0.0165754	-0.0367977	-0.00407746	0.0223399	-0.0703649	-0.0409887	-0.00401682	-0.002356	0.00200649	-0.0127032	-0.000124625	-0.00079751	-0.00707914	0.00340986	-0.000915437	0.000781194	-0.000329746	Mass 1
39	2023-05-24 05:00:00	7.42	0	16.68	21.82	0.13	0.53	12.9939	99.6976	-0.00913139	16.43	-0.484911	-0.0213541	0.0294798	-0.0167939	-0.0348716	-0.00441027	0.0111956	-0.038057	-0.0342281	-0.0193438	-0.000581612	0.00339954	-0.0119559	-4.87126e-05	-0.000720511	-0.00919697	0.00481921	-0.00100321	0.000790355	-0.000308744	Mass 1
40	2023-05-24 06:00:00	7.42	0	16.68	21.82	0.13	0.53	14.5482	99.7067	-0.0182431	16.43	-0.532324	-0.0247718	0.0487477	-0.0408959	-0.0371101	-0.00585004	-0.0314565	-0.0894673	-0.0503289	-0.0232459	-0.00643752	0.000321288	-0.0158089	-0.000156032	-0.00147501	-0.00633762	0.00489071	-1.50828e-05	0.00128794	-0.000438859	Mass 1
41	2023-05-24 07:00:00	7.42	0	16.68	21.82	0.13	0.53	16.3354	100.05	-0.0278933	16.43	-0.646065	-0.0238445	0.0545122	-0.0655373	-0.037878	-0.00341924	0.0306408	-0.160591	-0.0730664	-0.065738	-0.0160298	-0.00594165	-0.0171774	-0.000230219	-0.00120869	-0.00526931	0.00502947	0.000774757	0.00188632	-0.000630019	Mass 1
42	2023-05-24 08:00:00	7.42	0	16.68	21.82	0.13	0.53	18.3558	97.9846	-0.0381074	16.43	-0.557786	-0.0146178	0.0789781	-0.0714102	-0.00683024	0.000277831	0.00601521	-0.133658	-0.0439232	-0.0679238	-0.0200175	0.0126728	-0.011945	-0.000367172	-0.00075223	-0.00153376	0.0187008	0.00107598	0.00282382	-0.00112318	Mass 1
43	2023-05-24 09:00:00	7.42	0	16.68	21.82	0.13	0.53	20.1164	94.0829	-0.0418257	16.43	-0.673924	-0.0193099	0.0925792	-0.112308	-0.0221269	-0.000710917	0.017679	-0.166793	-0.0767338	-0.108317	-0.0272382	0.0102221	-0.0166285	-0.000347193	-0.00120677	0.00017222	0.0125493	0.0015016	0.00401665	-0.00107696	Mass 1
44	2023-05-24 10:00:00	7.42	0	16.68	21.82	0.13	0.53	22.677	88.3427	-0.0438875	16.43	0.0179532	-0.016009	0.190105	-0.181953	-0.00157328	0.0011398	0.0180424	-0.131062	-0.0764078	-0.0839476	-0.0416031	0.00227918	-0.0154301	-0.000487376	0.000448762	0.00121963	0.0172874	0.00240244	0.00470076	-0.00158757	Mass 1
45	2023-05-24 11:00:00	7.42	0	16.68	21.82	0.13	0.53	25.0444	84.5344	-0.0291424	16.43	0.717058	-0.0237947	0.521572	-0.184956	-0.0158484	0.000933921	0.0897051	-0.00386899	0.156542	-0.12832	-0.0459496	0.071004	-0.0171153	-0.000469547	0.00259647	6.01886e-05	0.0346514	0.00430409	0.00971012	-0.00139463	Mass 1
46	2023-05-24 12:00:00	7.42	0	16.68	21.82	0.13	0.53	26.1268	81.5607	0.0832533	16.43	2.47372	0.015345	0.800666	0.0656648	0.0130238	0.00986831	0.103275	0.595758	0.783257	0.324906	0.0639592	0.202105	0.0194224	0.00118627	0.0112041	0.0196157	0.0813012	0.008614	0.0193791	0.00640732	Mass 1
47	2023-05-24 13:00:00	7.42	0	16.68	21.82	0.13	0.53	20.1082	93.6153	0.0539356	16.43	1.22919	0.00980196	0.34852	0.0867368	0.00887648	0.0049003	0.0393908	0.34403	0.224782	0.154416	0.0261801	0.0605484	0.00565159	0.000635896	0.00560054	0.0119113	0.0139608	0.00293176	0.00375092	0.00431773	Mass 1
48	2023-05-24 14:00:00	7.42	0	16.68	21.82	0.13	0.53	18.2882	97.2061	-0.0229583	16.43	-0.624085	-0.0376118	0.00441277	-0.0553952	-0.0463511	-0.00517052	-0.00663932	-0.199222	-0.0379582	-0.0294523	-0.0266048	0.00464299	-0.021722	-0.000343398	-0.00176881	-0.00890434	0.00892665	-0.000539272	0.000644715	-0.0289556	Mass 1
49	2023-05-23 15:00:00	13.8	4.83	53.65	50.09	0	1.69	20.1702	93.2667	#N/A	16.79	#N/A	#N/A	#N/A	#N/A	#N/A	#N/A	#N/A	#N/A	#N/A	#N/A	#N/A	#N/A	#N/A	#N/A	#N/A	#N/A	#N/A	#N/A	#N/A	#N/A	Mass 2
50	2023-05-23 16:00:00	13.8	4.83	53.65	50.09	0	1.69	20.5072	92.4915	#N/A	16.79	#N/A	#N/A	#N/A	#N/A	#N/A	#N/A	#N/A	#N/A	#N/A	#N/A	#N/A	#N/A	#N/A	#N/A	#N/A	#N/A	#N/A	#N/A	#N/A	#N/A	Mass 2
51	2023-05-23 17:00:00	13.8	4.83	53.65	50.09	0	1.69	18.9315	95.3726	-0.0698899	16.79	-1.24512	-0.026306	0.497694	-0.130087	-0.0610774	-0.00444234	-0.021694	-0.0337697	-0.201871	-0.19925	-0.0655647	-0.0300901	-0.0345246	-0.000711514	-0.00407181	-0.00850979	-0.00222952	0.00275759	0.0106639	0.021271	Mass 2
52	2023-05-23 18:00:00	13.8	4.83	53.65	50.09	0	1.69	17.1474	97.8657	-0.0524375	16.79	-1.12627	-0.0297684	0.343036	-0.10141	-0.0678343	-0.00634374	0.0251396	-0.0402786	-0.180237	-0.0762051	-0.0420839	-0.0254306	-0.0293334	-0.000463119	-0.000859881	0.000796721	0.000827815	0.00188828	0.00493866	0.0107561	Mass 2
53	2023-05-23 19:00:00	13.8	4.83	53.65	50.09	0	1.69	15.6496	99.8847	-0.0307365	16.79	-0.390448	-0.0293405	0.288214	-0.0620534	-0.0590243	-0.0045131	0.00990481	-0.0515515	-0.113997	-0.0429081	-0.0159131	-0.0143549	-0.0210549	-0.000355617	-0.000983906	-0.0116031	-0.00174176	0.00104779	0.00574425	0.00959527	Mass 2
54	2023-05-23 20:00:00	13.8	4.83	53.65	50.09	0	1.69	15.0738	99.426	-0.0269469	16.79	-0.538771	-0.0290662	0.266243	-0.0578083	-0.0522411	-0.0045424	-0.0450593	-0.0486505	-0.130641	-0.0382479	-0.0137158	-0.0169207	-0.0183098	-0.000310838	3.43127e-06	-0.0138283	0.000610231	0.000586624	0.00455049	0.00666731	Mass 2
55	2023-05-23 21:00:00	13.8	4.83	53.65	50.09	0	1.69	14.6686	99.2823	-0.0206929	16.79	-0.356144	-0.0277701	0.26049	-0.0492396	-0.0473231	-0.0053176	-0.0204603	-0.0130242	-0.122376	-0.0330206	-0.0115331	-0.0153987	-0.0145667	-0.000212611	0.000221054	-0.00801722	-0.000575058	0.000818619	0.00397308	0.00500074	Mass 2
56	2023-05-23 22:00:00	13.8	4.83	53.65	50.09	0	1.69	14.178	99.5341	-0.0226434	16.79	-0.267147	-0.0273027	0.241151	-0.0413248	-0.0450591	-0.0029557	0.0296326	-0.00831339	-0.109953	-0.0290739	-0.00917473	-0.0119235	-0.0125106	-0.000150573	-0.000349194	-0.007279	0.000895382	0.000704352	0.00360523	0.00492781	Mass 2
57	2023-05-23 23:00:00	13.8	4.83	53.65	50.09	0	1.69	14.254	99.7458	-0.0292778	16.79	-0.579596	-0.0307773	0.232346	-0.0525883	-0.0463053	-0.00729065	0.0294744	-0.0530995	-0.112353	-0.0341073	-0.0147593	-0.013016	-0.0146084	-0.000247153	0.000520011	-0.0108425	5.72303e-05	0.0013243	0.00357814	0.00547564	Mass 2
58	2023-05-24	13.8	4.83	53.65	50.09	0	1.69	13.988	99.834	-0.0243466	16.79	-0.401553	-0.0295879	0.243872	-0.0530296	-0.0455005	-0.00760458	-0.0432902	-0.0450303	-0.106042	-0.0286253	-0.0131791	-0.0128673	-0.0147107	-0.000310422	-0.000541751	-0.00969756	0.000400636	0.00137698	0.00321926	0.00493755	Mass 2
59	2023-05-24 01:00:00	13.8	4.83	53.65	50.09	0	1.69	13.606	100.052	-0.0163982	16.79	-0.495997	-0.0257145	0.239038	-0.0420893	-0.0370102	-0.00415872	0.0192242	0.00849545	-0.0863203	-0.0188456	-0.00601628	-0.00886193	-0.0111586	-0.000135948	-0.000891629	-0.00898733	0.000419477	0.00150251	0.0028298	0.00538864	Mass 2
60	2023-05-24 02:00:00	13.8	4.83	53.65	50.09	0	1.69	13.69	100.243	-0.0148536	16.79	-0.276231	-0.0234378	0.216849	-0.0409122	-0.040059	-0.00582349	-0.122252	-0.00159868	-0.0784664	-0.0203299	-0.00711331	-0.00865752	-0.0105586	-0.000178579	0.000283651	-0.00523927	-0.000342802	0.00116904	0.00241535	0.00402152	Mass 2
61	2023-05-24 03:00:00	13.8	4.83	53.65	50.09	0	1.69	12.6989	100.643	-0.0147514	16.79	-0.346557	-0.0238386	0.2158	-0.0308988	-0.0375998	-0.00591284	0.0155971	0.00901508	-0.0725338	-0.0155087	-0.0047132	-0.00685389	-0.0101091	-0.000146326	-0.00106782	-0.00779187	-0.000564797	0.000881818	0.00228115	0.0048907	Mass 2
62	2023-05-24 04:00:00	13.8	4.83	53.65	50.09	0	1.69	12.568	100.732	-0.0138607	16.79	-0.355403	-0.0229635	0.206708	-0.0259251	-0.0371557	-0.00430114	0.0243105	0.00210958	-0.063477	-0.0155545	-0.00392093	-0.00635017	-0.00985666	-0.000130536	-0.000180621	-0.0062389	-0.000116071	0.00131067	0.00216066	0.00434156	Mass 2
63	2023-05-24 05:00:00	13.8	4.83	53.65	50.09	0	1.69	13.6625	100.359	-0.0133028	16.79	-0.494014	-0.022124	0.232467	-0.0267585	-0.034695	-0.00501383	0.00978371	0.0457346	-0.0587673	-0.026631	-0.00274757	-0.0049013	-0.00954953	-2.49657e-05	-0.000165679	-0.00813447	-0.000461004	0.000897808	0.00234698	0.0054144	Mass 2
64	2023-05-24 06:00:00	13.8	4.83	53.65	50.09	0	1.69	14.8064	100.323	-0.0224544	16.79	-0.568555	-0.0250885	0.254086	-0.0540149	-0.0353737	-0.00629487	-0.0432043	-0.0107214	-0.080077	-0.0392332	-0.0104547	-0.00839622	-0.0134006	-0.000155897	0.000122512	-0.0060025	-0.000576699	0.00239435	0.00402704	0.0100501	Mass 2
65	2023-05-24 07:00:00	13.8	4.83	53.65	50.09	0	1.69	16.595	100.03	-0.03287	16.79	-0.693528	-0.0241512	0.300864	-0.0805383	-0.0375331	-0.00404313	0.0241432	-0.0527459	-0.108355	-0.0932727	-0.0216535	-0.0133202	-0.01505	-0.000289886	0.000225604	-0.00850554	-0.00202173	0.00240934	0.00479699	0.0188388	Mass 2
66	2023-05-24 08:00:00	13.8	4.83	53.65	50.09	0	1.69	19.5226	95.7016	-0.0459517	16.79	-0.487259	-0.0159361	0.444255	-0.132496	-0.0034514	0.000289615	-0.00635988	-0.00735241	-0.0946184	-0.104089	-0.0268911	-0.014935	-0.00991851	-0.000583919	-0.0022324	-0.00523868	-0.0030111	0.00377307	0.00837746	0.0252018	Mass 2
67	2023-05-24 09:00:00	13.8	4.83	53.65	50.09	0	1.69	21.3074	92.9161	-0.0535119	16.79	-0.645587	-0.0208184	0.541022	-0.143158	-0.0226825	-0.0018894	0.00496048	-0.0186558	-0.127558	-0.156157	-0.0334857	-0.016535	-0.0125727	-0.000390743	-0.000349664	-0.00424434	-0.00270126	0.00470226	0.0171451	0.0634297	Mass 2
68	2023-05-24 10:00:00	13.8	4.83	53.65	50.09	0	1.69	24.8768	85.2475	-0.0529045	16.79	0.37299	-0.0178813	0.786681	-0.170529	0.00110625	0.00114817	-0.00318139	0.0243853	-0.044037	-0.148949	-0.0519903	-0.0102704	-0.0113112	-0.000461755	0.00111068	-0.00226913	-0.0033242	0.00667756	0.0232892	0.0869795	Mass 2
69	2023-05-24 11:00:00	13.8	4.83	53.65	50.09	0	1.69	24.8984	85.3078	-0.0521225	16.79	0.732519	-0.0272203	1.01283	-0.0967285	-0.0122339	-0.000860485	0.0419784	0.0683489	0.0319954	-0.216643	-0.0649797	-0.00805146	-0.0135563	-0.000288918	0.000432498	-0.0048498	-0.00522068	0.0085931	0.0300183	0.0981195	Mass 2
70	2023-05-24 12:00:00	13.8	4.83	53.65	50.09	0	1.69	23.0937	89.0151	0.0374071	16.79	1.66081	0.00903677	1.17737	0.104551	0.00892892	0.00591858	0.0312627	0.565345	0.202147	0.177047	0.0315128	0.0456876	0.0116913	0.000751437	0.00815201	0.0100201	-8.85083e-05	0.00810226	0.0288845	0.10204	Mass 2
71	2023-05-24 13:00:00	13.8	4.83	53.65	50.09	0	1.69	19.6158	94.604	0.0345879	16.79	0.892978	0.00785792	0.882079	0.0433995	0.00836456	0.00477459	0.0202657	0.505761	0.0535899	0.0882068	0.0160131	0.028575	0.00547018	0.000589117	0.00516186	0.00820453	0.00126931	0.00426298	0.00681447	0.01378	Mass 2
72	2023-05-24 14:00:00	13.8	4.83	53.65	50.09	0	1.69	17.9442	97.3321	-0.0353901	16.79	-0.635843	-0.0379924	0.465474	-0.086812	-0.0443218	-0.00597629	-0.0248738	-0.0176871	-0.106626	-0.0573523	-0.0320204	-0.0110265	-0.0165199	-0.000323492	-0.000429333	-0.012232	0.000902376	0.00173692	0.00473358	-0.0271689	Mass 2
73	2023-05-23 15:00:00	25.95	1.82	18.42	34.74	0	1.16	21.8618	88.1562	#N/A	13.79	#N/A	#N/A	#N/A	#N/A	#N/A	#N/A	#N/A	#N/A	#N/A	#N/A	#N/A	#N/A	#N/A	#N/A	#N/A	#N/A	#N/A	#N/A	#N/A	#N/A	Mass 3
74	2023-05-23 16:00:00	25.95	1.82	18.42	34.74	0	1.16	22.4706	85.866	#N/A	13.79	#N/A	#N/A	#N/A	#N/A	#N/A	#N/A	#N/A	#N/A	#N/A	#N/A	#N/A	#N/A	#N/A	#N/A	#N/A	#N/A	#N/A	#N/A	#N/A	#N/A	Mass 3
75	2023-05-23 17:00:00	25.95	1.82	18.42	34.74	0	1.16	19.2512	91.3331	-0.0635831	13.79	-1.02136	-0.0248102	-0.150281	-0.162347	-0.0518349	-0.00400428	-0.0225579	0.334063	-0.251757	-0.208794	-0.06965	-0.0443107	-0.0338347	0.0774432	0.0337954	-0.0105257	0.00235498	0.00772224	0.0536763	0.0282363	Mass 3
76	2023-05-23 18:00:00	25.95	1.82	18.42	34.74	0	1.16	16.7149	94.7717	-0.0475883	13.79	-1.1739	-0.0300002	-0.159572	-0.106074	-0.0649201	-0.00645897	0.0240847	0.140544	-0.191115	-0.0880224	-0.0460853	-0.0347244	-0.0292173	0.0515013	0.0217612	-0.00481303	0.00300777	0.00442005	0.0282909	0.0136631	Mass 3
77	2023-05-23 19:00:00	25.95	1.82	18.42	34.74	0	1.16	14.9126	96.4416	-0.0262071	13.79	-0.356894	-0.0290128	-0.0943493	-0.0637303	-0.0573636	-0.00443492	0.00885823	0.129246	-0.116133	-0.0422943	-0.0172688	-0.0200249	-0.0214438	0.0288133	0.019225	-0.0165584	-0.000741494	0.00326018	0.0279787	0.0113699	Mass 3
78	2023-05-23 20:00:00	25.95	1.82	18.42	34.74	0	1.16	14.1361	96.442	-0.0226243	13.79	-0.53463	-0.0284895	-0.0761938	-0.05756	-0.050116	-0.00470624	-0.045692	0.10898	-0.131787	-0.0384803	-0.0151651	-0.0219109	-0.0170508	0.0226389	0.0186485	-0.0168477	0.00228123	0.00247983	0.0227744	0.00862448	Mass 3
79	2023-05-23 21:00:00	25.95	1.82	18.42	34.74	0	1.16	13.4263	97.1533	-0.0184204	13.79	-0.322867	-0.0271137	-0.0598894	-0.0492394	-0.045641	-0.00561101	-0.0201036	0.139053	-0.122929	-0.0337314	-0.0129395	-0.0195293	-0.0129697	0.0198398	0.0177914	-0.0108881	0.000452404	0.00251789	0.0191622	0.00680337	Mass 3
80	2023-05-23 22:00:00	25.95	1.82	18.42	34.74	0	1.16	13.109	97.767	-0.0202416	13.79	-0.261347	-0.0275992	-0.0558107	-0.0392373	-0.0438163	-0.00277141	0.0310472	0.133728	-0.108803	-0.0311885	-0.00986872	-0.015878	-0.0110773	0.0180795	0.0174185	-0.00884496	0.00154463	0.00300229	0.0188793	0.00662653	Mass 3
81	2023-05-23 23:00:00	25.95	1.82	18.42	34.74	0	1.16	13.109	97.9984	-0.0252584	13.79	-0.584031	-0.0313964	-0.0746709	-0.0520047	-0.0445683	-0.00716996	0.0291996	0.0833335	-0.111516	-0.0342199	-0.0165225	-0.0176239	-0.0117701	0.0191598	0.0184454	-0.012978	0.00083145	0.00341581	0.0189052	0.00725083	Mass 3
82	2023-05-24	25.95	1.82	18.42	34.74	0	1.16	13.0255	98.0944	-0.0211335	13.79	-0.374633	-0.0290426	-0.0691848	-0.0528772	-0.0433596	-0.00758011	-0.0428991	0.104179	-0.105792	-0.0270696	-0.0139427	-0.016733	-0.0109596	0.0198424	0.018334	-0.0127218	0.000946216	0.00315468	0.015949	0.00674628	Mass 3
83	2023-05-24 01:00:00	25.95	1.82	18.42	34.74	0	1.16	12.4577	98.6606	-0.0143158	13.79	-0.481561	-0.0262942	-0.046655	-0.0412323	-0.0358446	-0.00418206	0.0191518	0.148143	-0.085699	-0.0180377	-0.00650014	-0.0129879	-0.00726723	0.0174331	0.0154893	-0.0108451	0.00178155	0.00322968	0.0138198	0.00677453	Mass 3
84	2023-05-24 02:00:00	25.95	1.82	18.42	34.74	0	1.16	11.9233	98.9025	-0.0126638	13.79	-0.263939	-0.0239996	-0.0434653	-0.039798	-0.0391023	-0.00604	-0.122482	0.124574	-0.0779075	-0.0200771	-0.00806131	-0.0122685	-0.00664868	0.0148397	0.0146011	-0.00740163	0.000271739	0.00314235	0.0116153	0.00714744	Mass 3
85	2023-05-24 03:00:00	25.95	1.82	18.42	34.74	0	1.16	11.606	99.1534	-0.0116772	13.79	-0.335318	-0.0240073	-0.0343201	-0.0288523	-0.0370515	-0.00577631	0.0161149	0.1333	-0.0721253	-0.0146454	-0.00628206	-0.0101095	-0.00531228	0.0140724	0.0131951	-0.00962411	0.000355756	0.00295693	0.0116839	0.00745933	Mass 3
86	2023-05-24 04:00:00	25.95	1.82	18.42	34.74	0	1.16	11.606	99.3743	-0.0110496	13.79	-0.337203	-0.0233585	-0.0322858	-0.0234546	-0.0359177	-0.00409699	0.0243854	0.123826	-0.0621113	-0.0143392	-0.00439681	-0.00906242	-0.00491574	0.0131877	0.014483	-0.00833203	0.000821944	0.00290671	0.0112139	0.00770481	Mass 3
87	2023-05-24 05:00:00	25.95	1.82	18.42	34.74	0	1.16	12.3575	99.0706	-0.00995027	13.79	-0.500474	-0.0218938	-0.017162	-0.0240041	-0.0339138	-0.00464689	0.00982465	0.191635	-0.0563326	-0.0303191	-0.00288821	-0.00770569	-0.00394552	0.0153399	0.01791	-0.0115866	0.000627518	0.00343923	0.0138759	0.0121352	Mass 3
88	2023-05-24 06:00:00	25.95	1.82	18.42	34.74	0	1.16	14.3447	97.8483	-0.019775	13.79	-0.588261	-0.025523	-0.058634	-0.0532249	-0.0333896	-0.00652831	-0.0427841	0.152946	-0.0803794	-0.0466614	-0.0117748	-0.0127528	-0.00634365	0.019995	0.0231056	-0.00949624	0.00139537	0.00662129	0.0215042	0.0192618	Mass 3
89	2023-05-24 07:00:00	25.95	1.82	18.42	34.74	0	1.16	18.4415	93.3444	-0.028837	13.79	-0.626991	-0.024818	-0.0767852	-0.0812044	-0.0346108	-0.00408336	0.0250186	0.14458	-0.110379	-0.105891	-0.0227305	-0.0194918	-0.00781921	0.0281045	0.0332668	-0.00959304	0.000265592	0.00697731	0.0291814	0.0251451	Mass 3
90	2023-05-24 08:00:00	25.95	1.82	18.42	34.74	0	1.16	21.8784	84.3008	-0.0398868	13.79	0.064846	-0.0160774	-0.0815426	-0.143201	0.00268299	2.42055e-05	-0.00578677	0.242974	-0.150717	-0.114982	-0.0265965	-0.0276351	-0.00398918	0.040357	0.0308401	-0.00331991	0.00044397	0.0105339	0.0523703	0.0213482	Mass 3
91	2023-05-24 09:00:00	25.95	1.82	18.42	34.74	0	1.16	22.7957	81.8712	-0.0487795	13.79	0.0241204	-0.0205289	-0.105829	-0.159495	-0.014347	-0.00161654	0.00646255	0.1966	-0.18216	-0.169632	-0.0345395	-0.0335174	-0.00995671	0.0520964	0.0363072	-0.00254057	0.00266326	0.0125303	0.0883916	0.0386198	Mass 3
92	2023-05-24 10:00:00	25.95	1.82	18.42	34.74	0	1.16	25.0787	77.9568	-0.056403	13.79	0.0813244	-0.0178338	-0.10387	-0.197467	0.00828875	0.000535313	-0.0108259	0.202306	-0.192505	-0.183344	-0.060075	-0.0363973	-0.00986345	0.0621775	0.0371776	-0.00281047	0.00288933	0.0131576	0.101627	0.0538592	Mass 3
93	2023-05-24 11:00:00	25.95	1.82	18.42	34.74	0	1.16	45.1399	42.1128	0.0180273	13.79	8.10948	-0.0182464	1.07178	-0.197859	0.0159062	0.00234372	0.192803	1.11401	-0.168085	-0.0109876	-0.00235223	-0.0343221	-0.00579385	0.104404	0.0301857	0.00809258	0.00590233	0.120106	0.298447	0.0294876	Mass 3
94	2023-05-24 12:00:00	25.95	1.82	18.42	34.74	0	1.16	38.7608	47.3734	0.119045	13.79	9.47101	0.0185974	0.752098	0.0493916	0.0692416	0.00956376	0.11021	1.8333	0.154181	0.304976	0.0972246	0.0533359	0.0110785	0.175425	0.0303375	0.0141914	0.00597466	0.0351287	0.235093	0.0940043	Mass 3
95	2023-05-24 13:00:00	25.95	1.82	18.42	34.74	0	1.16	21.9865	80.0279	0.0682696	13.79	2.73883	0.0119998	0.271658	0.21195	0.0209926	0.00593035	0.0332185	0.94677	0.163315	0.141445	0.0267593	0.0306036	0.00691875	0.0738444	0.0240214	0.00781168	0.00469785	0.0110837	0.0596484	0.0548311	Mass 3
96	2023-05-24 14:00:00	25.95	1.82	18.42	34.74	0	1.16	18.4256	88.1336	-0.0266331	13.79	-0.217481	-0.0365847	-0.0717388	-0.0737033	-0.0372123	-0.00498541	-0.0199998	0.185126	-0.0860051	-0.0401189	-0.0299163	-0.0121378	-0.0170096	0.0494218	0.0154761	-0.0143302	0.00394289	0.00588595	0.0560339	-0.0175093	Mass 3
97	2023-05-23 15:00:00	30.07	0	22.91	135.71	0.41	2.84	20.8618	92.1986	#N/A	30.55	#N/A	#N/A	#N/A	#N/A	#N/A	#N/A	#N/A	#N/A	#N/A	#N/A	#N/A	#N/A	#N/A	#N/A	#N/A	#N/A	#N/A	#N/A	#N/A	#N/A	Mass 4
98	2023-05-23 16:00:00	30.07	0	22.91	135.71	0.41	2.84	21.4299	91.016	#N/A	30.55	#N/A	#N/A	#N/A	#N/A	#N/A	#N/A	#N/A	#N/A	#N/A	#N/A	#N/A	#N/A	#N/A	#N/A	#N/A	#N/A	#N/A	#N/A	#N/A	#N/A	Mass 4
99	2023-05-23 17:00:00	30.07	0	22.91	135.71	0.41	2.84	19.3114	93.1451	-0.0653104	30.55	-1.23259	-0.0240922	-0.111174	-0.152818	-0.0612607	-0.00379251	-0.00542822	0.365655	-0.0753686	-0.14979	-0.0635188	0.00397336	-0.0366217	0.0312285	-0.00486283	-0.00960534	0.00369611	0.0116086	0.00237575	0.0116528	Mass 4
100	2023-05-23 18:00:00	30.07	0	22.91	135.71	0.41	2.84	16.9047	94.7468	-0.0521533	30.55	-1.20664	-0.0305995	-0.144147	-0.101435	-0.0684264	-0.0063791	0.0332859	0.071179	-0.0796828	-0.0594452	-0.0416139	0.00363491	-0.0294944	0.0335773	-0.0016284	-0.00474742	0.00370754	0.00757164	0.00100309	0.00666566	Mass 4
101	2023-05-23 19:00:00	30.07	0	22.91	135.71	0.41	2.84	15.536	96.1303	-0.0270968	30.55	-0.329455	-0.0289125	-0.0923712	-0.0590394	-0.0596246	-0.0043894	0.0168192	0.101225	-0.0292497	-0.0145806	-0.0156243	0.00577644	-0.0260267	0.0284521	-0.00132106	-0.0149578	-1.08484e-05	0.00624507	0.00141118	0.00645786	Mass 4
102	2023-05-23 20:00:00	30.07	0	22.91	135.71	0.41	2.84	14.6746	95.1864	-0.0237498	30.55	-0.512865	-0.0288514	-0.0709995	-0.0557529	-0.0524118	-0.00395253	-0.0397926	0.10574	-0.0696428	-0.011148	-0.0132688	0.00148025	-0.0215379	0.0232093	-0.000781139	-0.0146133	0.0033515	0.00562826	0.00144219	0.00570433	Mass 4
103	2023-05-23 21:00:00	30.07	0	22.91	135.71	0.41	2.84	13.9298	95.806	-0.0171731	30.55	-0.320026	-0.0275721	-0.0529933	-0.0487947	-0.0474203	-0.00527778	-0.0173712	0.155345	-0.0814836	-0.0081477	-0.0117532	0.0015052	-0.018399	0.0199995	-0.00051919	-0.00832179	0.000870007	0.00595206	0.00145028	0.00503757	Mass 4
104	2023-05-23 22:00:00	30.07	0	22.91	135.71	0.41	2.84	13.6468	96.2657	-0.0208741	30.55	-0.249038	-0.0272031	-0.0463017	-0.0400033	-0.0453981	-0.00258969	0.0328272	0.161463	-0.0739062	-0.00530915	-0.00799935	-0.00693649	-0.0143246	0.0179079	-0.000815959	-0.00671971	0.00186103	0.0058011	0.0015225	0.00527446	Mass 4
105	2023-05-23 23:00:00	30.07	0	22.91	135.71	0.41	2.84	13.5844	96.7643	-0.0220362	30.55	-0.552509	-0.0309146	-0.0577658	-0.0533938	-0.0463408	-0.00669534	0.0352692	0.146874	-0.078223	-0.00373314	-0.0142594	-0.00904312	-0.0164859	0.0175312	-0.000280244	-0.0117158	0.00111406	0.00645307	0.00165688	0.00573062	Mass 4
106	2023-05-24	30.07	0	22.91	135.71	0.41	2.84	13.6078	97.1022	-0.0198004	30.55	-0.362287	-0.0287924	-0.053722	-0.0516349	-0.0458931	-0.00746578	-0.0363162	0.160324	-0.0323105	0.000239109	-0.0113942	0.00805743	-0.0165762	0.0167256	-0.00191546	-0.0107479	0.00193036	0.00562501	0.00142893	0.00512307	Mass 4
107	2023-05-24 01:00:00	30.07	0	22.91	135.71	0.41	2.84	13.4405	97.4245	#N/A	30.55	#N/A	#N/A	#N/A	#N/A	#N/A	#N/A	#N/A	#N/A	#N/A	#N/A	#N/A	#N/A	#N/A	#N/A	#N/A	#N/A	#N/A	#N/A	#N/A	#N/A	Mass 4
108	2023-05-24 02:00:00	30.07	0	22.91	135.71	0.41	2.84	12.6083	97.6393	-0.0113801	30.55	-0.26541	-0.0232561	-0.0296636	-0.0316047	-0.0407868	-0.0058082	-0.120419	0.151675	-0.0510796	0.00255283	-0.00655214	-0.00704221	-0.0115158	0.0139259	-0.000635111	-0.00528153	0.00111967	0.00561628	0.00139377	0.00563053	Mass 4
109	2023-05-24 03:00:00	30.07	0	22.91	135.71	0.41	2.84	12.7	97.6135	-0.0101749	30.55	-0.3366	-0.0237925	-0.0229624	-0.0258401	-0.0384322	-0.00554446	0.0173225	0.1651	-0.0480998	0.00640076	-0.00429578	-0.00592781	-0.0109836	0.0130871	-0.00208446	-0.00780077	0.000274026	0.00519196	0.00128685	0.00670349	Mass 4
110	2023-05-24 04:00:00	30.07	0	22.91	135.71	0.41	2.84	12.7	97.8361	-0.0110121	30.55	-0.336878	-0.0225262	-0.0175431	-0.0226117	-0.0374877	-0.00376806	0.0270883	0.170155	-0.0388452	0.00786669	-0.0028971	-0.004758	-0.010536	0.0123092	-0.00121575	-0.00616095	0.000665204	0.00536652	0.00155355	0.00773086	Mass 4
111	2023-05-24 05:00:00	30.07	0	22.91	135.71	0.41	2.84	13.1742	98.128	-0.0082129	30.55	-0.476376	-0.0207964	0.00560925	-0.0232433	-0.0354288	-0.0042064	0.0150774	0.284071	-0.0250232	-0.000265282	-0.00131561	-0.00240549	-0.00977653	0.0120738	-0.00140609	-0.00962591	0.00058993	0.00629945	0.00182431	0.0102559	Mass 4
112	2023-05-24 06:00:00	30.07	0	22.91	135.71	0.41	2.84	15.0362	98.4291	-0.0172683	30.55	-0.618085	-0.0250756	-0.0356876	-0.0525925	-0.0360625	-0.00627546	-0.0402064	0.233137	-0.0397423	-0.00883561	-0.00912633	-0.00773081	-0.0139477	0.00737692	-0.000977692	-0.00806674	0.00112788	0.00984966	0.00286581	0.0181225	Mass 4
113	2023-05-24 07:00:00	30.07	0	22.91	135.71	0.41	2.84	17.181	98.138	-0.0262786	30.55	-0.678581	-0.0236275	-0.0591348	-0.0784365	-0.0384625	-0.0038758	0.0272689	0.250927	-0.0592406	-0.0643782	-0.0199715	-0.012606	-0.015194	0.0077733	-0.00162024	-0.00622657	0.0016768	0.0101742	0.00319364	0.0290774	Mass 4
114	2023-05-24 08:00:00	30.07	0	22.91	135.71	0.41	2.84	20.5221	94.9191	-0.0345803	30.55	0.00832862	-0.0136509	0.0165954	-0.139112	-0.00252606	0.000689663	0.00130408	0.450976	-0.080927	-0.0428038	-0.0231953	-0.0162668	-0.0100059	0.00962327	-0.00406082	6.25317e-05	0.00288866	0.0133759	0.00420546	0.0349627	Mass 4
115	2023-05-24 09:00:00	30.07	0	22.91	135.71	0.41	2.84	22.4211	91.4743	-0.0426369	30.55	-0.160453	-0.0178585	-0.00719808	-0.151786	-0.0220852	-0.00108405	0.0172911	0.5031	-0.0622889	-0.0673463	-0.027887	-0.0166406	-0.0149609	0.0142909	-0.000279177	0.00325756	0.0102549	0.0180695	0.00813659	0.0598889	Mass 4
116	2023-05-24 10:00:00	30.07	0	22.91	135.71	0.41	2.84	23.6585	88.1436	-0.046861	30.55	0.173174	-0.0147684	-0.0054011	-0.18873	0.000183906	0.00154629	0.00274262	0.556394	-0.0227888	-0.068214	-0.0517924	0.0122715	-0.0139729	0.0191527	0.00304739	0.00386381	0.0200028	0.0196011	0.0111927	0.0723177	Mass 4
117	2023-05-24 11:00:00	30.07	0	22.91	135.71	0.41	2.84	23.9468	86.3079	-0.0513758	30.55	0.216524	-0.023248	0.0222108	-0.174297	-0.0152949	-8.07699e-05	0.048739	0.61039	0.18479	-0.12345	-0.0659668	0.0498967	-0.0179385	0.0237378	0.00752803	0.00351526	0.0485212	0.0236882	0.0208351	0.118409	Mass 4
118	2023-05-24 12:00:00	30.07	0	22.91	135.71	0.41	2.84	23.7694	86.2276	0.0447591	30.55	1.77032	0.0120311	0.287478	0.0442575	0.0104418	0.00718762	0.0543388	1.09761	0.354772	0.233162	0.0279611	0.123105	0.0084485	0.0281455	0.010849	0.0150436	0.0139894	0.0179306	0.0114452	0.0754113	Mass 4
119	2023-05-24 13:00:00	30.07	0	22.91	135.71	0.41	2.84	19.7588	90.2597	0.0363441	30.55	0.700338	0.00838956	0.157836	0.0452728	0.00832239	0.00515301	0.0392864	0.602864	0.252239	0.114115	0.0154289	0.0913168	0.00575986	0.0454112	0.00597303	0.00947338	0.00489185	0.0113824	0.00500199	0.024392	Mass 4
120	2023-05-24 14:00:00	30.07	0	22.91	135.71	0.41	2.84	17.8827	93.3731	-0.034835	30.55	-0.641067	-0.036994	-0.087399	-0.0842146	-0.044181	-0.00498026	-0.0124817	0.0778459	0.0611354	-0.0353582	-0.032232	0.0254984	-0.0178336	0.040642	-1.77795e-05	-0.0135046	0.00294483	0.00846522	0.00299515	-0.0188297	Mass 4
121	2023-05-24 15:00:00	0	9.37	40.35	125.66	11.97	0.36	#N/A	98.4007	#N/A	0	#N/A	#N/A	#N/A	#N/A	#N/A	#N/A	#N/A	#N/A	#N/A	#N/A	#N/A	#N/A	#N/A	#N/A	#N/A	#N/A	#N/A	#N/A	#N/A	#N/A	Soil
122	2023-05-24 16:00:00	0	9.37	40.35	125.66	11.97	0.36	16.8458	99.4083	-0.0483083	0	-0.709848	-0.0440736	0.134992	-0.0960571	-0.0419415	-0.00870094	0.0170199	-0.298032	-0.124438	-0.0189217	-0.02398	-0.0215561	-0.0156345	-0.000524825	-0.00259025	0.207352	-0.00202427	0.00323821	-0.000735844	0.0031762	Soil
123	2023-05-24 17:00:00	0	9.37	40.35	125.66	11.97	0.36	15.9847	99.9683	-0.0496408	0	-0.46174	-0.0492827	0.118251	-0.105471	-0.03562	-0.0101262	0.0230335	-0.250974	-0.137558	-0.0201452	-0.0196626	-0.0250554	-0.0103528	-0.000545919	-0.00326513	0.137911	-0.00139449	0.00109146	-0.000680854	0.00343718	Soil
124	2023-05-24 18:00:00	0	9.37	40.35	125.66	11.97	0.36	15.0755	98.8649	-0.0417042	0	-0.523594	-0.0458299	0.125376	-0.088041	-0.0325145	-0.00671552	-0.0635002	-0.247156	-0.140723	-0.028057	-0.0153947	-0.0237264	-0.0110978	-0.000469328	-0.00264719	0.0837142	-0.000993051	0.000731345	-0.000625452	0.0033158	Soil
125	2023-05-24 19:00:00	0	9.37	40.35	125.66	11.97	0.36	14.5412	99.3546	-0.0460076	0	-0.533769	-0.0516531	0.0900483	-0.0974156	-0.0353255	-0.00461997	0.0128946	-0.264616	-0.14609	-0.0247325	-0.0165171	-0.0252247	-0.0154316	-0.000597988	-0.00230797	0.0273027	-0.000306929	0.000254576	-0.000649981	0.00337618	Soil
126	2023-05-24 20:00:00	0	9.37	40.35	125.66	11.97	0.36	14.0736	99.3917	-0.0460834	0	-0.312585	-0.051562	0.0841257	-0.1045	-0.0333273	-0.0074634	0.0161851	-0.24149	-0.153788	-0.0215925	-0.0150851	-0.0268366	-0.010348	-0.000561328	-0.00226053	0.0497806	-0.00111933	0.000374679	-0.000452572	0.00361047	Soil
127	2023-05-24 21:00:00	0	9.37	40.35	125.66	11.97	0.36	13.606	99.5881	-0.0461506	0	-0.351957	-0.0488423	0.073683	-0.0995012	-0.0325738	-0.00859358	0.0157888	-0.222013	-0.141117	-0.0202766	-0.0125457	-0.024044	-0.00960386	-0.000624888	-0.00269221	0.0441279	-0.000608503	0.000597938	-0.00041377	0.00371571	Soil
128	2023-05-24 22:00:00	0	9.37	40.35	125.66	11.97	0.36	13.4643	99.6712	-0.0378915	0	-0.469321	-0.0466835	0.107187	-0.0771184	-0.0358723	-0.00724445	0.0167763	-0.193161	-0.105097	-0.0150857	-0.00971325	-0.0176098	-0.0114819	-0.000491055	-0.00144146	0.0387992	4.06987e-05	0.000155247	-0.00039321	0.00355167	Soil
129	2023-05-24 23:00:00	0	9.37	40.35	125.66	11.97	0.36	13.106	99.7956	-0.042621	0	-0.506504	-0.0489592	0.0837322	-0.0869103	-0.0354374	-0.00710598	0.0140546	-0.206435	-0.104821	-0.0170803	-0.0106058	-0.017919	-0.01109	-0.000481819	-0.00224809	0.0393077	-6.85837e-05	0.00042679	-0.000324031	0.00349569	Soil
130	2023-05-25	0	9.37	40.35	125.66	11.97	0.36	13.106	99.959	-0.0326509	0	-0.321323	-0.0442325	0.106196	-0.0702844	-0.0324758	-0.00760669	0.0201924	-0.167648	-0.0905706	-0.0156027	-0.00817145	-0.0152211	-0.00870822	-0.000416389	-0.00176648	0.0415168	0.000209922	4.15926e-05	-0.000303526	0.00362229	Soil
131	2023-05-25 01:00:00	0	9.37	40.35	125.66	11.97	0.36	13.106	100.045	-0.0326712	0	-0.36653	-0.0426998	0.111217	-0.0534054	-0.0315593	-0.00687915	-0.0017092	-0.159507	-0.083003	-0.0159137	-0.00875596	-0.0155537	-0.0100688	-0.00039093	-0.00174208	0.0415335	0.000110154	0.00024565	-0.000295743	0.00362267	Soil
132	2023-05-25 02:00:00	0	9.37	40.35	125.66	11.97	0.36	13.106	100.107	-0.0331959	0	-0.458003	-0.0460969	0.107978	-0.0415337	-0.0313728	-0.00485575	0.00530642	-0.166631	-0.0763015	-0.0175789	-0.00792206	-0.0148081	-0.0118336	-0.000462124	-0.00214278	0.0329717	-0.000473385	0.000371486	-0.000246574	0.00346011	Soil
133	2023-05-25 03:00:00	0	9.37	40.35	125.66	11.97	0.36	13.0559	100.21	-0.0329473	0	-0.423925	-0.0450924	0.119611	-0.0189541	-0.0329534	-0.00824685	0.0163398	-0.166877	-0.062586	-0.017547	-0.00739042	-0.0130963	-0.0104131	-0.000403222	-0.00174057	0.0222752	0.000174942	0.000289405	-0.000306094	0.00289908	Soil
134	2023-05-25 04:00:00	0	9.37	40.35	125.66	11.97	0.36	12.605	100.132	-0.0319578	0	-0.370437	-0.0429199	0.120182	-0.00824983	-0.0303893	-0.00752362	0.0118804	-0.171717	-0.0726005	-0.0153315	-0.00775801	-0.0140994	-0.0115015	-0.000381854	-0.00139543	0.02059	-0.000549032	0.000547935	-0.00038035	0.00306839	Soil
135	2023-05-25 05:00:00	0	9.37	40.35	125.66	11.97	0.36	12.605	100.303	-0.0362995	0	-0.584149	-0.0441441	0.105106	-0.0340258	-0.0311623	-0.00719062	0.0191782	-0.190464	-0.0892136	-0.0195196	-0.00887964	-0.0161067	-0.0133306	-0.000390084	-0.00206608	0.0178389	-0.000304009	0.000485296	-0.000365152	0.00384508	Soil
136	2023-05-25 06:00:00	0	9.37	40.35	125.66	11.97	0.36	12.9641	100.2	-0.0397407	0	-0.551205	-0.046554	0.100519	-0.0339092	-0.032678	-0.00700189	0.0152134	-0.191818	-0.0949189	-0.0264398	-0.00903837	-0.0166194	-0.0139731	-0.000509286	-0.00124752	0.0188234	-0.000168071	-1.5694e-05	-0.000291207	0.00383758	Soil
137	2023-05-25 07:00:00	0	9.37	40.35	125.66	11.97	0.36	13.106	100.234	-0.03632	0	-0.444696	-0.0419697	0.0892589	-0.0666232	-0.0266355	-0.00874032	-0.0543885	-0.20471	-0.0988211	-0.0166787	-0.00910675	-0.0179136	-0.0135268	-0.000414123	-0.00122718	0.00842298	-0.000314378	-1.28689e-05	-0.000269276	0.00375647	Soil
138	2023-05-25 08:00:00	0	9.37	40.35	125.66	11.97	0.36	12.6635	100.279	-0.0421896	0	-0.459293	-0.0462849	0.0788944	-0.0943353	-0.031156	-0.007485	0.0110206	-0.21294	-0.115306	-0.0259294	-0.00959747	-0.01876	-0.0113175	-0.000418794	-0.00169788	0.0177279	0.000388852	0.000655942	-0.000257626	0.00441342	Soil
139	2023-05-25 09:00:00	0	9.37	40.35	125.66	11.97	0.36	12.605	100.359	-0.0452165	0	-0.410921	-0.044262	0.0666344	-0.112854	-0.0250474	-0.00869416	0.00554882	-0.235103	-0.115261	-0.0329249	-0.011429	-0.0185377	-0.0092278	-0.000506572	-0.00170467	0.0180652	0.000729642	0.00108324	-0.000233581	0.00469344	Soil
140	2023-05-25 10:00:00	0	9.37	40.35	125.66	11.97	0.36	12.6718	100.096	-0.0468747	0	-0.403466	-0.0454199	0.0729152	-0.119188	-0.0264448	-0.00651862	-0.0772009	-0.239193	-0.115104	-0.0385764	-0.0120602	-0.0181084	-0.010339	-0.000578147	-0.00159376	0.0187656	0.000157754	0.00127397	-0.000199435	0.00589488	Soil
141	2023-05-25 11:00:00	0	9.37	40.35	125.66	11.97	0.36	13.331	99.9918	-0.0425499	0	-0.359167	-0.0443474	0.0904252	-0.105504	-0.0291958	-0.00570001	0.021555	-0.220318	-0.118381	-0.0406441	-0.0122095	-0.0190545	-0.0115031	-0.000780596	-0.00210646	0.0203714	0.000328957	0.000550149	-0.000340497	0.00695841	Soil
142	2023-05-25 12:00:00	0	9.37	40.35	125.66	11.97	0.36	13.606	100.046	-0.0529158	0	-0.349272	-0.0450906	0.103711	-0.136045	-0.0278528	-0.00746107	0.0311017	-0.239207	-0.0944987	-0.0386403	-0.0117994	-0.0175598	-0.00896053	-0.00076102	-0.00111905	0.0291523	0.00645405	0.00145044	-0.000123729	0.0223272	Soil
143	2023-05-25 13:00:00	0	9.37	40.35	125.66	11.97	0.36	15.9011	98.7493	-0.0631442	0	-0.532114	-0.0519746	0.102672	-0.144112	-0.0382965	-0.00913943	0.0239241	-0.274918	-0.103064	-0.105494	-0.0201019	-0.0199915	-0.0114326	-0.000829911	-0.00131866	0.0270045	0.00873236	0.000989847	-0.0003124	0.0175988	Soil
144	2023-05-25 14:00:00	0	9.37	40.35	125.66	11.97	0.36	17.1777	96.9062	-0.0677691	0	-0.562153	-0.0530601	0.1554	-0.157362	-0.0177144	-0.00812256	0.0233383	-0.271079	-0.132308	-0.115806	-0.0228214	-0.0236167	-0.00932389	-0.000853551	-0.00116987	0.0320271	0.00677423	0.000855579	-0.000263751	0.0178515	Soil
145	2023-05-24 15:00:00	4.25	9.26	36.49	56.17	0.06	0.11	#N/A	99.5321	-0.0279916	40.22	-0.412509	-0.0404113	-0.056457	-0.0481814	-0.042962	-0.00544103	0.0276944	-0.159016	-0.051549	-0.0107728	-0.0208084	-0.00275304	-0.0214658	-0.000373406	-0.00210697	-0.00652099	0.00269633	0.000645048	0.000699109	-0.00800349	Mass 1
146	2023-05-24 16:00:00	4.25	9.26	36.49	56.17	0.06	0.11	16.5329	101.005	-0.0371284	40.22	-0.477007	-0.0425823	-0.0720029	-0.0638838	-0.0413834	-0.00790078	0.0237724	-0.259336	-0.0866984	-0.0148126	-0.0188577	-0.0085245	-0.0221872	-0.000478813	-0.000917243	-0.00811278	0.00476608	0.000132804	0.000575634	-0.00442904	Mass 1
147	2023-05-24 17:00:00	4.25	9.26	36.49	56.17	0.06	0.11	15.8595	101.651	-0.0394133	40.22	-0.25813	-0.0475781	-0.0783073	-0.0864839	-0.0344848	-0.00913767	0.0234509	-0.216925	-0.116368	-0.0113984	-0.0159051	-0.016751	-0.0156113	-0.000488285	-0.0017374	-0.00527735	0.00372307	-0.000523423	0.000526757	-0.00297459	Mass 1
148	2023-05-24 18:00:00	4.25	9.26	36.49	56.17	0.06	0.11	15.1831	100.373	-0.0335732	40.22	-0.337663	-0.0447667	-0.0656704	-0.0635063	-0.0336421	-0.0063182	-0.055255	-0.217157	-0.122422	-0.0154745	-0.0116421	-0.0160199	-0.0147994	-0.000463948	-0.00159182	-0.00692134	0.00489931	-0.000455659	0.000475344	-0.0023103	Mass 1
149	2023-05-24 19:00:00	4.25	9.26	36.49	56.17	0.06	0.11	14.6821	100.41	-0.040163	40.22	-0.362842	-0.0506342	-0.0937256	-0.0769701	-0.0352448	-0.00468381	0.0195585	-0.243057	-0.132405	-0.0130284	-0.0132493	-0.0187597	-0.017714	-0.000541006	-0.00115659	-0.034324	0.00493912	-0.000275942	0.000397796	-0.00191488	Mass 1
150	2023-05-24 20:00:00	4.25	9.26	36.49	56.17	0.06	0.11	14.2555	100.44	-0.0394502	40.22	-0.159313	-0.0504926	-0.098819	-0.0858275	-0.0343608	-0.00711382	0.0208059	-0.222658	-0.142539	-0.00887022	-0.0118201	-0.0204374	-0.0131656	-0.00064366	-0.000794875	-0.00372742	0.0039671	5.55967e-05	0.000573791	-0.0016338	Mass 1
151	2023-05-24 21:00:00	4.25	9.26	36.49	56.17	0.06	0.11	14.13	100.778	-0.0379464	40.22	-0.189906	-0.047533	-0.0933387	-0.077842	-0.0329386	-0.00820852	0.0187175	-0.203267	-0.130447	-0.006142	-0.00894946	-0.0175125	-0.0123737	-0.000628496	-0.000950585	-0.00328831	0.00476669	-6.37869e-06	0.000534855	-0.00153682	Mass 1
152	2023-05-24 22:00:00	4.25	9.26	36.49	56.17	0.06	0.11	13.7292	100.792	-0.030969	40.22	-0.311888	-0.0457097	-0.0680404	-0.0602713	-0.0357912	-0.00708519	0.01684	-0.181319	-0.0973327	-0.00285234	-0.00682425	-0.0113129	-0.0134996	-0.000506753	-0.000880158	-0.00847236	0.00346899	-0.000357057	0.000681463	-0.00162528	Mass 1
153	2023-05-24 23:00:00	4.25	9.26	36.49	56.17	0.06	0.11	13.629	100.937	-0.0356244	40.22	-0.352473	-0.0480853	-0.0786239	-0.0713872	-0.0358807	-0.00670854	0.0177948	-0.194028	-0.0992804	-0.00484972	-0.00799793	-0.0111314	-0.0136124	-0.000460305	-0.00063	-0.00551991	0.00473112	-0.000226517	0.00049976	-0.00163346	Mass 1
154	2023-05-25	4.25	9.26	36.49	56.17	0.06	0.11	13.629	101.118	-0.02576	40.22	-0.179159	-0.0432272	-0.0588511	-0.0600985	-0.032928	-0.00730992	0.0226681	-0.157933	-0.0898093	-0.00368988	-0.00581369	-0.00750884	-0.0115004	-0.000477455	-0.000898633	-0.00448579	0.00536875	-0.000358464	0.000476471	-0.00148912	Mass 1
155	2023-05-25 01:00:00	4.25	9.26	36.49	56.17	0.06	0.11	13.3368	100.887	-0.0247036	40.22	-0.223736	-0.0418166	-0.0467517	-0.0526529	-0.0319541	-0.00650518	0.00367127	-0.148057	-0.0927094	-0.00432191	-0.0059712	-0.00938515	-0.0126663	-0.000434537	-0.000441073	-0.00612246	0.00399627	-0.000449995	0.000559246	-0.00153525	Mass 1
156	2023-05-25 02:00:00	4.25	9.26	36.49	56.17	0.06	0.11	13.128	100.994	-0.0279974	40.22	-0.306829	-0.0447612	-0.0575327	-0.0540042	-0.0322282	-0.00500512	0.0106845	-0.158989	-0.0937607	-0.00491248	-0.00546379	-0.0104289	-0.0133027	-0.000479754	-0.00122009	-0.00599445	0.00271197	7.39224e-05	0.000515015	-0.00160016	Mass 1
157	2023-05-25 03:00:00	4.25	9.26	36.49	56.17	0.06	0.11	13.128	101.043	-0.0267808	40.22	-0.274107	-0.0432822	-0.0540666	-0.0440524	-0.0327817	-0.00756716	0.0130526	-0.15939	-0.0822963	-0.00506082	-0.00521075	-0.00903565	-0.0126773	-0.000450942	-0.00127369	-0.00883571	0.00349919	-0.000313132	0.000525274	-0.00181262	Mass 1
158	2023-05-25 04:00:00	4.25	9.26	36.49	56.17	0.06	0.11	13.128	101.101	-0.0264067	40.22	-0.215985	-0.0417941	-0.0556249	-0.0503466	-0.0309396	-0.00765602	0.0163105	-0.163617	-0.0884329	-0.0037051	-0.00596845	-0.00980099	-0.0145989	-0.000410223	-0.000635136	-0.00786484	0.00298339	-0.000200095	0.000443455	-0.00165964	Mass 1
159	2023-05-25 05:00:00	4.25	9.26	36.49	56.17	0.06	0.11	13.128	101.076	-0.0321284	40.22	-0.425635	-0.0432556	-0.0649033	-0.0587671	-0.0316654	-0.00691479	0.0230232	-0.181261	-0.0946198	-0.00702473	-0.00694006	-0.0114608	-0.0153041	-0.000392867	-0.000950334	-0.00940611	0.00263579	-0.000287133	0.000477417	-0.00167048	Mass 1
160	2023-05-25 06:00:00	4.25	9.26	36.49	56.17	0.06	0.11	13.128	101.133	-0.0333318	40.22	-0.383685	-0.0446602	-0.0656632	-0.055228	-0.0313406	-0.00638949	0.0127741	-0.179196	-0.0913169	-0.0122173	-0.00681251	-0.0114682	-0.0150974	-0.000474515	-0.000576136	-0.00767687	0.00180234	-0.000611524	0.000513859	-0.00176248	Mass 1
161	2023-05-25 07:00:00	4.25	9.26	36.49	56.17	0.06	0.11	13.128	101.28	-0.0320699	40.22	-0.289641	-0.0418865	-0.0739706	-0.0636202	-0.0288701	-0.00868771	-0.0444527	-0.192383	-0.0940522	-0.00592367	-0.00715802	-0.0127396	-0.0157602	-0.000551511	-0.00101724	-0.0152553	0.00301264	-0.00033219	0.00049339	-0.00182417	Mass 1
162	2023-05-25 08:00:00	4.25	9.26	36.49	56.17	0.06	0.11	13.128	101.248	-0.0361629	40.22	-0.305879	-0.0445651	-0.0803808	-0.0789754	-0.0308732	-0.00687777	0.00837112	-0.201009	-0.109546	-0.0140323	-0.00754765	-0.0133535	-0.0129781	-0.00043289	-0.000364522	-0.00834021	0.00308225	0.000117862	0.000429181	-0.00162588	Mass 1
163	2023-05-25 09:00:00	4.25	9.26	36.49	56.17	0.06	0.11	13.128	101.264	-0.0405486	40.22	-0.259342	-0.0424686	-0.0840457	-0.0914301	-0.0266843	-0.00833473	0.00820069	-0.216568	-0.109587	-0.0205524	-0.0089059	-0.0113644	-0.0116002	-0.000489869	-0.00129412	-0.00555978	0.00236965	4.10913e-05	0.000439524	-0.00178581	Mass 1
164	2023-05-25 10:00:00	4.25	9.26	36.49	56.17	0.06	0.11	13.128	101.19	-0.038494	40.22	-0.249347	-0.044032	-0.0761836	-0.0937489	-0.0283028	-0.00613026	-0.0692085	-0.217769	-0.110139	-0.0250774	-0.00985125	-0.00647322	-0.0133925	-0.000521652	-0.000795739	-0.00691122	0.0031654	0.000449984	0.000455749	-0.00210085	Mass 1
165	2023-05-25 11:00:00	4.25	9.26	36.49	56.17	0.06	0.11	13.3201	101.143	-0.0347455	40.22	-0.179559	-0.0437387	-0.0594356	-0.0847825	-0.030444	-0.00561429	0.0266111	-0.195759	-0.113693	-0.0222086	-0.00913075	-0.0116696	-0.0135059	-0.000733377	-0.00127863	-0.00568975	0.00325128	7.79537e-05	0.000461704	-0.00226754	Mass 1
166	2023-05-25 12:00:00	4.25	9.26	36.49	56.17	0.06	0.11	13.629	101.304	-0.0463426	40.22	-0.141362	-0.0450005	-0.0606719	-0.119295	-0.0285619	-0.00677444	0.0336463	-0.20812	-0.101847	-0.00185245	-0.00837685	-0.01248	-0.0111292	-0.000718821	-0.000617254	-0.0013567	0.00686575	0.00123704	0.00185146	-0.00265446	Mass 1
167	2023-05-25 13:00:00	4.25	9.26	36.49	56.17	0.06	0.11	14.6485	102.283	-0.0533784	40.22	-0.243174	-0.0517114	-0.00670841	-0.130669	-0.0378215	-0.008131	0.0343486	-0.228334	-0.124074	-0.0652838	-0.016099	-0.0175917	-0.0137437	-0.000768351	-0.00105204	-0.00295578	0.00579731	0.000387642	0.00165649	-0.0061094	Mass 1
168	2023-05-25 14:00:00	4.25	9.26	36.49	56.17	0.06	0.11	15.1747	101.801	-0.058275	40.22	-0.2577	-0.0516975	-0.00972304	-0.142559	-0.0168471	-0.00714587	0.0342152	-0.227203	-0.105022	-0.0507179	-0.0163772	-0.019497	-0.0122307	-0.000748248	0.00014844	-0.00263147	0.0103497	0.000813601	0.00308745	-0.00471818	Mass 1
169	2023-05-24 15:00:00	8.58	8.45	41.5	99.4	0.17	0	16.7091	100.265	-0.0382342	41.22	-0.434213	-0.0402661	0.207292	-0.0867546	-0.04217	-0.00540023	0.0207877	-0.0147808	-0.1214	-0.0325657	-0.0258121	-0.0188319	-0.0248223	-0.000426092	-0.00235842	-0.00274448	-0.00496463	0.0017033	0.0034228	-0.0063502	Mass 2
170	2023-05-24 16:00:00	8.58	8.45	41.5	99.4	0.17	0	15.6378	101.35	-0.0425015	41.22	-0.46176	-0.0417907	0.232621	-0.0952259	-0.0409889	-0.00814041	0.0185076	-0.118518	-0.134498	-0.0307002	-0.0223191	-0.020602	-0.0216045	-0.000533677	-0.000584008	-0.00782289	-0.00124207	0.00134954	0.00213942	-0.00282417	Mass 2
171	2023-05-24 17:00:00	8.58	8.45	41.5	99.4	0.17	0	15.0159	100.602	-0.0454384	41.22	-0.254057	-0.0476958	0.203683	-0.102647	-0.0348347	-0.00961771	0.0251764	-0.116516	-0.148084	-0.0266452	-0.0186108	-0.0235929	-0.0150971	-0.000549487	-0.00156579	-0.00409961	-0.00123481	0.000178904	0.00158197	-0.00130512	Mass 2
172	2023-05-24 18:00:00	8.58	8.45	41.5	99.4	0.17	0	14.6111	100.175	-0.0372066	41.22	-0.315901	-0.0438912	0.223045	-0.0852386	-0.031513	-0.00648147	-0.0637831	-0.111515	-0.152268	-0.0283065	-0.013695	-0.0227896	-0.013354	-0.000561421	-0.00136735	-0.00511218	-0.00141649	0.000661236	0.00118709	-0.000224937	Mass 2
173	2023-05-24 19:00:00	8.58	8.45	41.5	99.4	0.17	0	14.71	100.32	-0.0421546	41.22	-0.345521	-0.0499496	0.184658	-0.0955691	-0.0335781	-0.00436161	0.012242	-0.143026	-0.158116	-0.0258591	-0.0155524	-0.0243169	-0.0167972	-0.000525481	-0.00117719	-0.0300058	-0.000382436	0.000604704	0.000796705	-0.000534697	Mass 2
174	2023-05-24 20:00:00	8.58	8.45	41.5	99.4	0.17	0	13.912	100.461	-0.0418573	41.22	-0.133651	-0.0497832	0.17865	-0.101755	-0.0328889	-0.00678587	0.0160432	-0.124689	-0.165236	-0.020759	-0.0136321	-0.0257708	-0.0120068	-0.000657311	-0.00135082	-0.00282112	-0.00193258	0.000451172	0.00088694	-0.000517565	Mass 2
175	2023-05-24 21:00:00	8.58	8.45	41.5	99.4	0.17	0	13.57	100.527	-0.0414954	41.22	-0.167559	-0.0477265	0.165131	-0.0963949	-0.0319349	-0.00832314	0.0159534	-0.104325	-0.155181	-0.0186753	-0.0110471	-0.0232619	-0.0112388	-0.000704266	-0.00184281	-0.00249754	-0.00101315	0.000844444	0.000696126	-0.000276934	Mass 2
176	2023-05-24 22:00:00	8.58	8.45	41.5	99.4	0.17	0	13.57	100.658	-0.0321581	41.22	-0.273884	-0.0455671	0.199189	-0.0766857	-0.0346371	-0.00713017	0.0184026	-0.0868256	-0.120118	-0.0146076	-0.00895633	-0.0169157	-0.0125505	-0.000524979	-0.00046361	-0.00656106	-0.000532168	0.000227576	0.00070033	-0.000827712	Mass 2
177	2023-05-24 23:00:00	8.58	8.45	41.5	99.4	0.17	0	13.594	100.802	-0.0406095	41.22	-0.320844	-0.0476539	0.176238	-0.0874529	-0.0342625	-0.00703195	0.01435	-0.101426	-0.120956	-0.015888	-0.00954087	-0.0175078	-0.0124363	-0.000550018	-0.00144329	-0.00451259	-0.000299411	0.00042788	0.000649211	-0.000185737	Mass 2
178	2023-05-25	8.58	8.45	41.5	99.4	0.17	0	13.69	100.859	-0.0293097	41.22	-0.169995	-0.0429693	0.201328	-0.0748867	-0.0314999	-0.00741978	0.0208495	-0.0745783	-0.11148	-0.0139814	-0.00772509	-0.0150662	-0.0105931	-0.000485157	-0.000710823	-0.00357327	-0.000327859	0.000208391	0.000591012	6.05888e-05	Mass 2
179	2023-05-25 01:00:00	8.58	8.45	41.5	99.4	0.17	0	13.69	101.069	-0.0315347	41.22	-0.209352	-0.0419455	0.199165	-0.06615	-0.0303753	-0.00687396	-0.00233035	-0.0659306	-0.110896	-0.0135456	-0.00766018	-0.0151689	-0.0116575	-0.00043756	-0.000937726	-0.00513807	-0.000939217	0.000131468	0.000547954	0.000196022	Mass 2
180	2023-05-25 02:00:00	8.58	8.45	41.5	99.4	0.17	0	13.69	100.961	-0.0303493	41.22	-0.293727	-0.0448047	0.202129	-0.0672624	-0.0296454	-0.00432339	0.00402717	-0.0700366	-0.109469	-0.0141535	-0.0070573	-0.0147484	-0.0125085	-0.000466579	-0.00134162	-0.00493539	-0.00109591	0.000359088	0.000469073	-0.000143925	Mass 2
181	2023-05-25 03:00:00	8.58	8.45	41.5	99.4	0.17	0	13.69	100.882	-0.0287501	41.22	-0.273071	-0.0433983	0.212843	-0.0565416	-0.0315394	-0.00811582	0.01792	-0.0743258	-0.0984129	-0.0146683	-0.00660424	-0.0135167	-0.0107295	-0.000525486	-0.000673418	-0.00724363	-0.000463034	0.000523407	0.000373988	-0.000593276	Mass 2
182	2023-05-25 04:00:00	8.58	8.45	41.5	99.4	0.17	0	13.69	100.944	-0.0285605	41.22	-0.211578	-0.0412868	0.212555	-0.0636474	-0.0279392	-0.00758683	0.01153	-0.0746347	-0.103487	-0.0135993	-0.00686991	-0.0140699	-0.0120726	-0.000460863	-0.000593831	-0.0071435	-0.00150225	0.000506898	0.000396485	-2.92175e-05	Mass 2
183	2023-05-25 05:00:00	8.58	8.45	41.5	99.4	0.17	0	13.69	100.907	-0.0322249	41.22	-0.415698	-0.0433358	0.200201	-0.0737274	-0.0297705	-0.00713627	0.0196096	-0.0916877	-0.110362	-0.0166762	-0.00844887	-0.0155997	-0.0137549	-0.000460655	-0.0012087	-0.00869499	-0.00127185	0.000472159	0.000394483	0.000108551	Mass 2
184	2023-05-25 06:00:00	8.58	8.45	41.5	99.4	0.17	0	13.69	101.035	-0.0374987	41.22	-0.352473	-0.0451164	0.208135	-0.0695713	-0.0308477	-0.00689019	0.0183875	-0.0774398	-0.107526	-0.0232691	-0.00848334	-0.0152529	-0.0150237	-0.000602435	-0.000327241	-0.00616399	-0.00113034	0.000118517	0.000290392	-0.000435011	Mass 2
185	2023-05-25 07:00:00	8.58	8.45	41.5	99.4	0.17	0	13.69	101.037	-0.0318636	41.22	-0.285852	-0.040851	0.199543	-0.0798244	-0.0249202	-0.00872	-0.0563781	-0.0979842	-0.109278	-0.0157057	-0.00877066	-0.0163677	-0.0133039	-0.000522325	-0.000127928	-0.0145816	-0.0014329	0.00048639	0.000265158	-0.000357632	Mass 2
186	2023-05-25 08:00:00	8.58	8.45	41.5	99.4	0.17	0	13.69	101.078	-0.0371243	41.22	-0.296384	-0.0442409	0.189352	-0.0892572	-0.0304735	-0.00751802	0.0139678	-0.102061	-0.118928	-0.0217612	-0.00782113	-0.0157199	-0.012029	-0.000301272	-0.000719034	-0.00776277	-0.000149557	0.000722052	0.000606892	0.000171927	Mass 2
187	2023-05-25 09:00:00	8.58	8.45	41.5	99.4	0.17	0	13.69	101.029	-0.0409054	41.22	-0.229339	-0.0418599	0.181703	-0.106159	-0.0248207	-0.00858291	0.0079976	-0.113638	-0.122393	-0.0278791	-0.0103273	-0.015731	-0.00945404	-0.000451435	-0.000793103	-0.00470001	-0.000225921	0.000982626	0.000594237	7.10089e-05	Mass 2
188	2023-05-25 10:00:00	8.58	8.45	41.5	99.4	0.17	0	13.622	100.934	-0.0405251	41.22	-0.215067	-0.0436918	0.211336	-0.111101	-0.0249901	-0.00618483	-0.0777121	-0.113034	-0.116638	-0.0309021	-0.0101667	-0.013521	-0.0109237	-0.000244978	-0.000523314	-0.00583419	-0.000850982	0.00151144	0.00109526	0.000779031	Mass 2
189	2023-05-25 11:00:00	8.58	8.45	41.5	99.4	0.17	0	13.57	100.87	-0.0362117	41.22	-0.144265	-0.0433155	0.249067	-0.0997664	-0.0275547	-0.00523374	0.0222456	-0.0614285	-0.124069	-0.0301249	-0.0108744	-0.0149407	-0.0123177	-0.000490081	-0.00106902	-0.00450615	-0.000802522	0.0009629	0.00074005	0.0011935	Mass 2
190	2023-05-25 12:00:00	8.58	8.45	41.5	99.4	0.17	0	15.778	101.581	-0.0469024	41.22	-0.0672193	-0.0453981	0.265819	-0.130986	-0.0277088	-0.00686534	0.0358507	-0.0860612	-0.122244	-0.0212136	-0.00999879	-0.0138913	-0.00824414	-0.000621524	-0.000189759	-0.00120732	-0.00176508	0.00227133	0.00468166	0.0276179	Mass 2
191	2023-05-25 13:00:00	8.58	8.45	41.5	99.4	0.17	0	16.6949	101.12	-0.0576614	41.22	-0.162045	-0.0525656	0.299816	-0.14025	-0.0369924	-0.0090539	0.0250822	-0.103023	-0.150287	-0.08952	-0.0197777	-0.0180246	-0.0125175	-0.000796626	-0.000862461	-0.00175383	-0.00068705	0.00163637	0.00137315	0.000341562	Mass 2
192	2023-05-25 14:00:00	8.58	8.45	41.5	99.4	0.17	0	18.08	99.0947	-0.0618622	41.22	-0.152511	-0.0530462	0.3423	-0.154279	-0.0169179	-0.00796804	0.026073	-0.112586	-0.169372	-0.0940946	-0.0222963	-0.0207046	-0.00931788	-0.000774883	-0.000295892	-0.00259667	-0.00111969	0.00187116	0.00172083	0.00643013	Mass 2
193	2023-05-24 15:00:00	26.13	6.61	12.65	87.11	0	0	16.3056	97.6021	-0.0300913	17.57	-0.501892	-0.0395688	-0.13425	-0.0707954	-0.041405	-0.00571967	0.0172216	0.296043	-0.0964505	-0.0310379	-0.0260999	-0.0172386	-0.0214788	0.0291358	0.0022286	0.00114932	-0.00365385	0.00620293	0.0349922	-0.000462263	Mass 3
194	2023-05-24 16:00:00	26.13	6.61	12.65	87.11	0	0	15.4464	99.3941	-0.0382213	17.57	-0.496398	-0.0405321	-0.137842	-0.0779031	-0.0399955	-0.00799359	0.0173952	0.0760909	-0.113968	-0.0226714	-0.0227704	-0.0212009	-0.0199961	0.021807	0.000999628	-0.00600439	0.000242864	0.00527316	0.02489	0.00144885	Mass 3
195	2023-05-24 17:00:00	26.13	6.61	12.65	87.11	0	0	14.6872	98.8134	-0.0405226	17.57	-0.279031	-0.0461328	-0.137555	-0.0853349	-0.0348447	-0.00942279	0.0264561	0.0547988	-0.12811	-0.0210938	-0.0187034	-0.024993	-0.0137621	0.0178502	-0.000494299	-0.000911578	-0.000562154	0.00373146	0.0198447	0.00195147	Mass 3
196	2023-05-24 18:00:00	26.13	6.61	12.65	87.11	0	0	14.1277	98.9344	-0.0318797	17.57	-0.354315	-0.0428887	-0.113158	-0.0601455	-0.0311304	-0.00621617	-0.0633232	0.0427099	-0.132789	-0.0229601	-0.0142362	-0.0246842	-0.0119313	0.0165183	0.000242803	0.00139707	-0.000451124	0.00395467	0.0146199	0.00315285	Mass 3
197	2023-05-24 19:00:00	26.13	6.61	12.65	87.11	0	0	13.635	99.3812	-0.0371087	17.57	-0.380262	-0.0487847	-0.137286	-0.0680049	-0.0333741	-0.00413658	0.0124003	-0.00349674	-0.148073	-0.0208748	-0.0166251	-0.0275426	-0.0155834	0.0154681	0.000331778	-0.0189304	0.000230308	0.00385643	0.0126906	0.00273644	Mass 3
198	2023-05-24 20:00:00	26.13	6.61	12.65	87.11	0	0	13.5849	99.635	-0.0376933	17.57	-0.171147	-0.0484674	-0.138009	-0.0727051	-0.0329386	-0.00701312	0.0161427	0.0192393	-0.160569	-0.0182166	-0.0143731	-0.0290717	-0.0114076	0.015404	0.000443731	0.000674984	-0.000891002	0.00331477	0.0115126	0.00301105	Mass 3
199	2023-05-24 21:00:00	26.13	6.61	12.65	87.11	0	0	13.1341	99.9595	-0.0377558	17.57	-0.214983	-0.0467022	-0.138877	-0.0685566	-0.0320232	-0.00819557	0.0154589	0.0213159	-0.151686	-0.0137471	-0.0117048	-0.0265978	-0.0100384	0.0156649	-0.00073578	0.00818454	-0.000171545	0.00406427	0.010891	0.00325875	Mass 3
200	2023-05-24 22:00:00	26.13	6.61	12.65	87.11	0	0	13.109	100.055	-0.0283274	17.57	-0.320718	-0.0445215	-0.101601	-0.0516457	-0.0347309	-0.00697853	0.0181725	0.0416525	-0.117093	-0.0105149	-0.00937374	-0.0204868	-0.0114806	0.0159907	0.000919049	-8.82463e-05	0.000211067	0.00312478	0.00903428	0.00374122	Mass 3
201	2023-05-24 23:00:00	26.13	6.61	12.65	87.11	0	0	13.0255	100.034	-0.036864	17.57	-0.373289	-0.0467631	-0.120349	-0.0654877	-0.0345254	-0.00682344	0.0145509	0.0243348	-0.116168	-0.0131461	-0.0103534	-0.0207692	-0.0110731	0.0168943	-0.000169641	-0.00117117	2.67118e-05	0.00351539	0.0102445	0.00502294	Mass 3
202	2023-05-25	26.13	6.61	12.65	87.11	0	0	12.608	100.387	-0.0241902	17.57	-0.202266	-0.0423414	-0.0941345	-0.0374782	-0.0321699	-0.00695724	0.0213363	0.0514186	-0.106759	-0.0109232	-0.00823915	-0.0187141	-0.00918271	0.0164985	0.000196006	-0.00137986	0.00022677	0.00309707	0.0090187	0.00581561	Mass 3
203	2023-05-25 01:00:00	26.13	6.61	12.65	87.11	0	0	12.608	100.463	-0.0251667	17.57	-0.236284	-0.0400514	-0.0842507	0.0296693	-0.0322962	-0.00661062	-0.0030838	0.0551011	-0.105581	-0.00968194	-0.00837732	-0.0182335	-0.0103299	0.0164929	8.10554e-05	-0.00240271	2.26584e-05	0.00340588	0.00875684	0.00486199	Mass 3
204	2023-05-25 02:00:00	26.13	6.61	12.65	87.11	0	0	12.608	100.507	-0.0262559	17.57	-0.330927	-0.0437642	-0.0901214	-0.0318283	-0.0311841	-0.00440551	0.00487805	0.0473323	-0.108236	-0.0111969	-0.00744942	-0.019097	-0.0120233	0.016688	-6.93554e-05	-0.00236387	-0.000397494	0.00352511	0.00761127	0.00436736	Mass 3
205	2023-05-25 03:00:00	26.13	6.61	12.65	87.11	0	0	12.608	100.603	-0.0239287	17.57	-0.301579	-0.0428559	-0.0852624	-0.0426522	-0.0314677	-0.00797854	0.0178211	0.0443811	-0.0974355	-0.0116181	-0.00762716	-0.0176011	-0.00989946	0.0161757	-3.21502e-05	-0.00452433	9.10004e-05	0.0033397	0.00689473	0.00360473	Mass 3
206	2023-05-25 04:00:00	26.13	6.61	12.65	87.11	0	0	12.608	100.772	-0.0254581	17.57	-0.244387	-0.0401375	-0.0886177	-0.0509957	-0.0279282	-0.0075338	0.0114163	0.0484954	-0.103827	-0.0101345	-0.00770954	-0.0183929	-0.0106858	0.0163437	0.000510582	-0.00509303	-0.000812127	0.00357583	0.00678129	0.00378414	Mass 3
207	2023-05-25 05:00:00	26.13	6.61	12.65	87.11	0	0	12.608	100.798	-0.0294806	17.57	-0.458323	-0.0422675	-0.101726	-0.0276689	-0.0302879	-0.00708578	0.0185899	0.0346446	-0.109211	-0.0116048	-0.00928606	-0.0202434	-0.0129227	0.0166422	-0.000464458	-0.00682005	-0.000722431	0.00372287	0.00632286	0.00380076	Mass 3
208	2023-05-25 06:00:00	26.13	6.61	12.65	87.11	0	0	12.608	101.075	-0.0346211	17.57	-0.429497	-0.044252	-0.106265	-0.0545533	-0.0312818	-0.00669029	0.0179853	0.0465839	-0.107146	-0.0189124	-0.00883426	-0.0204084	-0.0134527	0.0164134	0.00022781	-0.00278518	-0.000739147	0.00292717	0.00551414	0.00328185	Mass 3
209	2023-05-25 07:00:00	26.13	6.61	12.65	87.11	0	0	12.608	101.094	-0.0275822	17.57	-0.324099	-0.0389539	-0.107232	-0.0720482	-0.0247206	-0.00851316	-0.0568559	0.0260499	-0.108468	-0.0109863	-0.00919037	-0.02055	-0.0129402	0.0152216	0.000617306	-0.0131676	-0.000536599	0.00297618	0.00504928	0.00254163	Mass 3
210	2023-05-25 08:00:00	26.13	6.61	12.65	87.11	0	0	12.608	100.904	-0.0339738	17.57	-0.34515	-0.0436179	-0.112266	-0.0900727	-0.0304082	-0.00744987	0.0135992	0.0204813	-0.123799	-0.0185667	-0.00945072	-0.0216526	-0.0115155	0.0149092	-5.70186e-05	-0.0065947	0.000619447	0.00372748	0.00511408	0.00377124	Mass 3
211	2023-05-25 09:00:00	26.13	6.61	12.65	87.11	0	0	12.608	101.092	-0.0369808	17.57	-0.299279	-0.0415	-0.123814	-0.107989	-0.0239653	-0.00873439	0.00690153	-0.000206609	-0.125512	-0.0245061	-0.0113683	-0.021484	-0.00888007	0.0147626	-0.00010594	-0.00317392	1.81942e-05	0.0038654	0.00476533	0.00368969	Mass 3
212	2023-05-25 10:00:00	26.13	6.61	12.65	87.11	0	0	13.3011	100.619	-0.0364557	17.57	-0.280561	-0.041942	-0.123431	-0.111736	-0.0247492	-0.006142	-0.0787317	0.0249622	-0.122706	-0.0260087	-0.0120521	-0.0204031	-0.0096664	0.0161875	0.000178603	-0.0050137	-0.000380985	0.00524015	0.00653972	0.00550786	Mass 3
213	2023-05-25 11:00:00	26.13	6.61	12.65	87.11	0	0	13.61	100.544	-0.0342756	17.57	-0.234877	-0.0422845	-0.122562	-0.0980293	-0.0276837	-0.00515539	0.0216294	0.0573787	-0.128219	-0.0277106	-0.0119647	-0.0216536	-0.011549	0.0153147	-8.72488e-05	-0.00397997	0.000324116	0.00425744	0.00623407	0.00489931	Mass 3
214	2023-05-25 12:00:00	26.13	6.61	12.65	87.11	0	0	18.6754	95.5941	-0.0413803	17.57	0.290308	-0.0430858	-0.105057	-0.0835943	-0.0269172	-0.00655544	0.036153	0.0993286	-0.126346	-0.0160862	-0.00998966	-0.0195903	-0.00735589	0.0235215	0.00175336	0.000387258	0.00170625	0.00851088	0.0236445	0.034316	Mass 3
215	2023-05-25 13:00:00	26.13	6.61	12.65	87.11	0	0	17.9832	94.8609	-0.0514285	17.57	0.0142635	-0.0495041	-0.15371	-0.102532	-0.0351769	-0.00821917	0.0263261	0.0822825	-0.149314	-0.0694436	-0.0188613	-0.0243749	-0.0107492	0.0278495	0.0011485	-0.000674069	0.00100081	0.00693841	0.0143273	0.00771616	Mass 3
216	2023-05-25 14:00:00	26.13	6.61	12.65	87.11	0	0	20.2355	90.9153	-0.0538412	17.57	0.121185	-0.051514	-0.129592	-0.151323	-0.0132956	-0.00737487	0.0305679	0.0601801	-0.174952	-0.0814577	-0.0194339	-0.0302766	-0.0081476	0.031717	0.001278	-0.00185628	0.00101601	0.00823518	0.0142265	0.0158337	Mass 3
217	2023-05-24 15:00:00	36.97	4.12	12.94	73.96	0	0.16	16.0099	97.3034	-0.0282925	26.84	-0.478144	-0.0413563	-0.126286	-0.0871871	-0.0443979	-0.00532821	0.0220286	0.586235	-0.0247161	-0.000154954	-0.0265359	-0.000269806	-0.0230184	0.0247786	0.00452991	-0.00142184	-0.00272085	0.00647343	0.00223927	0.000989328	Mass 4
218	2023-05-24 16:00:00	36.97	4.12	12.94	73.96	0	0.16	15.7398	99.2039	-0.0362548	26.84	-0.493481	-0.0425317	-0.131001	-0.0952369	-0.0416036	-0.00780335	0.0211944	0.256084	-0.0605665	0.000777607	-0.0227211	-0.009534	-0.0212543	0.0204947	0.00726286	-0.00505659	0.00131763	0.00732489	0.00194389	0.00353975	Mass 4
219	2023-05-24 17:00:00	36.97	4.12	12.94	73.96	0	0.16	14.7173	98.5921	-0.0407917	26.84	-0.275853	-0.0478473	-0.130372	-0.101975	-0.0356991	-0.00952132	0.029748	0.206026	-0.0946034	0.00199684	-0.0188361	-0.0173349	-0.0140836	0.0174109	0.00541433	-0.000454215	0.00067855	0.00574481	0.00192806	0.00499998	Mass 4
220	2023-05-24 18:00:00	36.97	4.12	12.94	73.96	0	0.16	14.6349	98.8518	-0.0313901	26.84	-0.343833	-0.0444308	-0.108763	-0.0857608	-0.0321158	-0.00636918	-0.0607695	0.202141	-0.111956	-0.00431405	-0.0142686	-0.0183643	-0.0131139	0.0151681	0.00603139	-0.00303696	0.000417175	0.00636326	0.00173934	0.00496535	Mass 4
221	2023-05-24 19:00:00	36.97	4.12	12.94	73.96	0	0.16	14.76	99.321	-0.0378041	26.84	-0.369393	-0.0502604	-0.131761	-0.0953741	-0.0347754	-0.00415438	0.0146014	0.15427	-0.121162	-0.00244775	-0.0161434	-0.019694	-0.016785	0.0138446	0.00666472	-0.0324636	0.00116097	0.00580765	0.00146249	0.00522345	Mass 4
222	2023-05-24 20:00:00	36.97	4.12	12.94	73.96	0	0.16	14.76	99.5504	-0.0375789	26.84	-0.156291	-0.0497892	-0.131455	-0.0989715	-0.0341598	-0.00674503	0.0172829	0.171716	-0.130663	0.00141253	-0.0132934	-0.0224082	-0.0113376	0.0127171	0.00716569	6.43914e-05	-0.000124768	0.00499059	0.0016125	0.00511326	Mass 4
223	2023-05-24 21:00:00	36.97	4.12	12.94	73.96	0	0.16	13.6135	99.6916	-0.0368142	26.84	-0.18469	-0.0475804	-0.133868	-0.0946056	-0.0332167	-0.00822679	0.0165546	0.182567	-0.123601	0.00195498	-0.0111373	-0.020117	-0.0107219	0.0117383	0.00606026	0.00110264	0.000210795	0.00635363	0.00151177	0.00559156	Mass 4
224	2023-05-24 22:00:00	36.97	4.12	12.94	73.96	0	0.16	13.574	99.7803	-0.0261612	26.84	-0.302508	-0.0452921	-0.0961674	-0.0706497	-0.0363316	-0.00697906	0.0194858	0.1967	-0.0940236	0.00707286	-0.00860663	-0.0118988	-0.0124489	0.011259	0.00713154	-0.005083	0.00112905	0.00540444	0.00141232	0.00616991	Mass 4
225	2023-05-24 23:00:00	36.97	4.12	12.94	73.96	0	0.16	13.574	99.9112	-0.0347058	26.84	-0.374747	-0.0477869	-0.114583	-0.0756516	-0.0362532	-0.00676949	0.0166635	0.177695	-0.0969169	0.00387793	-0.00923544	-0.0154121	-0.0119878	0.0106919	0.00581831	-0.00255576	0.00118324	0.00570375	0.00134551	0.00651745	Mass 4
226	2023-05-25	36.97	4.12	12.94	73.96	0	0.16	13.574	100.05	-0.0233852	26.84	-0.185182	-0.043377	-0.0894467	-0.057658	-0.0335118	-0.00716751	0.0235361	0.19715	-0.0816672	0.00542486	-0.00736058	-0.0118556	-0.00986379	0.0101005	0.00725059	-0.000814254	0.00113461	0.00571278	0.00129664	0.00703351	Mass 4
227	2023-05-25 01:00:00	36.97	4.12	12.94	73.96	0	0.16	13.574	100.107	-0.0251695	26.84	-0.222726	-0.0418373	-0.0829417	-0.0417264	-0.0331801	-0.00706444	-9.59842e-05	0.203084	-0.0869585	0.00609112	-0.00746935	-0.0138539	-0.0112133	0.010298	0.00628842	-0.00241327	0.00122695	0.00573128	0.00141058	0.00623602	Mass 4
228	2023-05-25 02:00:00	36.97	4.12	12.94	73.96	0	0.16	13.6104	100.219	-0.0237463	26.84	-0.31294	-0.0446008	-0.0838958	-0.0518769	-0.0320205	-0.00431182	0.00455941	0.206656	-0.0866406	0.00533239	-0.00630141	-0.0136501	-0.0128097	0.0103093	0.00682177	-0.0024496	0.00073914	0.00572227	0.00124759	0.00637027	Mass 4
229	2023-05-25 03:00:00	36.97	4.12	12.94	73.96	0	0.16	13.73	100.283	-0.0244927	26.84	-0.289233	-0.0436659	-0.0761147	-0.0462386	-0.0336204	-0.00786602	0.0207037	0.19151	-0.0732087	0.00471146	-0.00606022	-0.00939425	-0.0114558	0.00980083	0.00662811	-0.00524566	0.00130085	0.00584999	0.00110531	0.00553503	Mass 4
230	2023-05-25 04:00:00	36.97	4.12	12.94	73.96	0	0.16	13.73	100.362	-0.0226375	26.84	-0.221596	-0.0410088	-0.0737791	-0.0542778	-0.0297027	-0.00741949	0.0144938	0.196841	-0.0699446	0.00731587	-0.00572696	-0.000328512	-0.0121967	0.0103425	0.00742778	-0.00497171	0.000419853	0.00625008	0.00108474	0.00576474	Mass 4
231	2023-05-25 05:00:00	36.97	4.12	12.94	73.96	0	0.16	13.6624	100.395	-0.0238191	26.84	-0.436226	-0.0419879	-0.0749929	0.0269028	-0.0329259	-0.00683604	0.0213091	0.191265	-0.0498645	0.0070414	-0.00679918	0.030683	-0.0160845	0.0105523	0.00674713	-0.00673559	0.000794561	0.00735378	0.00115456	0.00645166	Mass 4
232	2023-05-25 06:00:00	36.97	4.12	12.94	73.96	0	0.16	13.626	100.366	-0.0321378	26.84	-0.407934	-0.0453291	-0.0929089	-0.0603968	-0.0332261	-0.00691651	0.0212656	0.190877	-0.0853921	-0.00297344	-0.00771196	-0.0162154	-0.0142412	0.00947516	0.00695122	-0.00323088	0.00129592	0.00560818	0.0010524	0.00592074	Mass 4
233	2023-05-25 07:00:00	36.97	4.12	12.94	73.96	0	0.16	13.73	100.354	-0.0286937	26.84	-0.314995	-0.0412403	-0.10404	-0.0779534	-0.0268123	-0.00860199	-0.0559132	0.142625	-0.0886596	0.00338392	-0.00842884	-0.0179	-0.0137037	0.00915464	0.00703046	-0.0140024	0.000299443	0.00612808	0.000907589	0.00509046	Mass 4
234	2023-05-25 08:00:00	36.97	4.12	12.94	73.96	0	0.16	13.73	100.323	-0.0352626	26.84	-0.329323	-0.0451474	-0.10854	-0.0943996	-0.0320162	-0.00724708	0.0156881	0.140555	-0.102923	-0.00569276	-0.00823413	-0.0184829	-0.0118333	0.00897931	0.00599237	-0.00601001	0.00155956	0.00632212	0.000965519	0.00637131	Mass 4
235	2023-05-25 09:00:00	36.97	4.12	12.94	73.96	0	0.16	13.73	100.871	-0.0378338	26.84	-0.276416	-0.0430757	-0.118097	-0.11232	-0.025855	-0.00875123	0.00998738	0.121676	-0.104515	-0.011148	-0.0104318	-0.0182447	-0.0095566	0.008887	0.00574411	-0.00298778	0.00113474	0.00738814	0.000991891	0.0066421	Mass 4
236	2023-05-25 10:00:00	36.97	4.12	12.94	73.96	0	0.16	13.6156	100.492	-0.0378572	26.84	-0.262771	-0.0443359	-0.116771	-0.118591	-0.0269652	-0.00631862	-0.0765898	0.145346	-0.100716	-0.0151289	-0.0111988	-0.0173759	-0.0106152	0.00748759	0.00692674	-0.00447183	0.00127728	0.00822431	0.00111896	0.00939657	Mass 4
237	2023-05-25 11:00:00	36.97	4.12	12.94	73.96	0	0.16	13.574	100.433	-0.033222	26.84	-0.216832	-0.0443019	-0.112922	-0.106047	-0.0298883	-0.00535882	0.0236976	0.182142	-0.104618	-0.0169139	-0.0105015	-0.0185681	-0.0120114	0.00430877	0.0065739	-0.00268458	0.00147103	0.00760496	0.00106932	0.0090506	Mass 4
238	2023-05-25 12:00:00	36.97	4.12	12.94	73.96	0	0.16	15.0549	100.962	-0.0434549	26.84	-0.113126	-0.0462592	-0.116948	-0.134541	-0.0294922	-0.00660314	0.0347518	0.204624	-0.0768883	0.000759791	-0.0099087	-0.016462	-0.009187	0.00328919	0.00988959	0.00223031	0.00789128	0.0108733	0.00411207	0.0559475	Mass 4
239	2023-05-25 13:00:00	36.97	4.12	12.94	73.96	0	0.16	15.7519	101.327	-0.0525898	26.84	-0.248856	-0.0524277	-0.150926	-0.142886	-0.0391316	-0.00865553	0.0261331	0.248553	-0.103669	-0.0726043	-0.0190613	-0.020853	-0.0125641	0.00204374	0.00934345	0.00104583	0.0052509	0.0106355	0.00187125	0.016282	Mass 4
240	2023-05-25 14:00:00	36.97	4.12	12.94	73.96	0	0.16	16.7562	100.507	-0.056544	26.84	-0.24637	-0.0531469	-0.161635	-0.156096	-0.0186524	-0.00791481	0.0279696	0.260698	-0.110637	-0.0719319	-0.0211384	-0.0237111	-0.00959511	0.00233398	0.0115094	0.000926676	0.00684155	0.0110038	0.00230345	0.028414	Mass 4
241	2023-05-25 15:00:00	0	7.11	26.7	107.83	0	0.52	22.2687	87.1935	-0.0515961	0	-0.455008	-0.0165809	0.156203	-0.14333	-0.00296463	-0.000168937	-0.0111948	-0.211086	-0.0974801	-0.0935022	-0.0228939	-0.0155486	-0.00341814	-0.000918377	-0.00275776	0.0342984	0.00282528	0.000968282	-0.000185034	0.00947995	Soil
242	2023-05-25 16:00:00	0	7.11	26.7	107.83	0	0.52	18.4956	100.122	-0.0522531	0	-0.563829	-0.0347861	0.117734	-0.13401	-0.00268519	-0.00294336	0.0205221	-0.228854	-0.116609	-0.11875	-0.02408	-0.0184658	-0.00750864	-0.000915527	-0.00220844	0.0202149	0.00209885	0.000646023	-0.000242059	0.00634241	Soil
243	2023-05-25 17:00:00	0	7.11	26.7	107.83	0	0.52	17.2947	100.919	-0.0471755	0	-0.831028	-0.0499755	0.219327	-0.100286	-0.00348576	-0.00440686	0.0199026	-0.230963	-0.108122	-0.14846	-0.0198777	-0.0185949	-0.0122272	-0.000588612	-0.00115989	0.00513092	0.00237632	0.000183582	-0.000300144	0.00987281	Soil
244	2023-05-25 18:00:00	0	7.11	26.7	107.83	0	0.52	16.7104	101.432	-0.0461308	0	-0.839686	-0.0562177	0.218473	-0.09019	-0.000346687	-0.0120236	-0.0544578	-0.266002	-0.110005	-0.13209	-0.0232346	-0.0191895	-0.0160953	-0.000642162	-0.00122771	-0.00211488	0.00136665	-0.000137773	-0.000334641	0.00797305	Soil
245	2023-05-25 19:00:00	0	7.11	26.7	107.83	0	0.52	15.1004	101.515	-0.0440006	0	-0.366828	-0.0549493	0.192473	-0.0962491	0.000853886	-0.0103434	0.0308728	-0.260163	-0.103958	-0.0312649	-0.0152437	-0.0171514	-0.0194905	-0.000604416	-0.00118577	-0.0980076	0.000708781	-0.00177438	-0.000209471	0.00586402	Soil
246	2023-05-25 20:00:00	0	7.11	26.7	107.83	0	0.52	13.9817	100.581	-0.0343474	0	-0.301172	-0.050511	0.176808	-0.0785954	0.00195337	-0.00818598	0.0158377	-0.19044	-0.0979915	-0.0191414	-0.0092539	-0.0155372	-0.0102993	-0.000540571	-0.000846366	0.00225686	0.000142683	-0.000526097	-0.000113194	0.00410051	Soil
247	2023-05-25 21:00:00	0	7.11	26.7	107.83	0	0.52	13.331	100.738	-0.0326353	0	-0.359104	-0.0505694	0.161257	-0.0646341	0.000506488	-0.00735808	0.0201499	-0.17295	-0.090342	-0.0188073	-0.0082974	-0.014623	-0.0115448	-0.000349987	-0.00121772	0.000309142	0.000365218	-0.000635327	-0.000114076	0.00270185	Soil
248	2023-05-25 22:00:00	0	7.11	26.7	107.83	0	0.52	12.9223	100.76	-0.0345715	0	-0.316838	-0.0474066	0.143481	-0.0668013	0.00194849	-0.00875675	0.0262213	-0.166442	-0.0893438	-0.0198817	-0.00817178	-0.0172096	-0.0102604	-0.000444804	-0.0012921	0.000624347	-0.000115925	-0.00072045	-0.000119623	0.00232415	Soil
249	2023-05-25 23:00:00	0	7.11	26.7	107.83	0	0.52	12.605	100.913	-0.0322037	0	-0.370683	-0.0492645	0.134073	-0.0616114	0.0017862	-0.0079913	0.0110535	-0.172864	-0.0859845	-0.0195273	-0.00827001	-0.016253	-0.0109501	-0.000399663	-0.00119819	-0.000775722	0.000419251	-0.000413402	-0.00014193	0.00224661	Soil
250	2023-05-26	0	7.11	26.7	107.83	0	0.52	12.1541	101.341	-0.0297084	0	-0.263824	-0.0477435	0.124795	-0.0590555	0.0023325	-0.00455996	0.0229305	-0.154709	-0.0836188	-0.0166638	-0.00742714	-0.0151075	-0.00941972	-0.000504594	-0.000712466	-0.000252921	0.000154605	-0.000584989	-0.00022382	0.00199967	Soil
251	2023-05-26 01:00:00	0	7.11	26.7	107.83	0	0.52	12.104	101.251	-0.0303301	0	-0.229925	-0.0483578	0.115878	-0.0582508	0.000981604	-0.00286954	0.0354597	-0.16956	-0.0821399	-0.0180735	-0.00820789	-0.0150606	-0.00939102	-0.000481305	-0.000891979	0.000825147	-0.000120783	-0.000187015	-9.00106e-05	0.00194705	Soil
252	2023-05-26 02:00:00	0	7.11	26.7	107.83	0	0.52	11.8117	101.287	-0.0346474	0	-0.304685	-0.0488342	0.121911	-0.0524762	0.00221035	-0.00319357	0.0200033	-0.155856	-0.0752524	-0.0159943	-0.00723841	-0.0141303	-0.0107697	-0.000456389	-0.000810965	0.0143694	-0.000415686	-0.000673167	-0.000201587	0.00176161	Soil
253	2023-05-26 03:00:00	0	7.11	26.7	107.83	0	0.52	11.603	101.154	-0.0370265	0	-0.321431	-0.0508545	0.106842	-0.0552494	0.00153017	-0.00463144	0.0256236	-0.183353	-0.0803435	-0.01432	-0.0081967	-0.0152365	-0.00851857	-0.000586852	-0.000889788	0.0256404	-0.000223989	-0.00104962	-0.000223063	0.00165203	Soil
254	2023-05-26 04:00:00	0	7.11	26.7	107.83	0	0.52	11.603	101.269	-0.0292179	0	-0.254114	-0.0480639	0.12458	-0.0458973	0.00224307	-0.00391273	0.0205538	-0.134076	-0.071238	-0.014312	-0.00529101	-0.0133419	-0.0103387	-0.000464178	-0.000985562	-0.000683658	0.00017008	-0.000589809	-0.000162823	0.00161175	Soil
255	2023-05-26 05:00:00	0	7.11	26.7	107.83	0	0.52	11.795	101.374	-0.030518	0	-0.371217	-0.0467542	0.130048	-0.0414921	0.00145416	-0.00544943	0.00962667	-0.136564	-0.066185	-0.0372621	-0.00465357	-0.0129417	-0.00975216	-0.00047701	-0.00102971	-0.00366406	0.000387298	-0.00092406	-0.000187251	0.00207125	Soil
256	2023-05-26 06:00:00	0	7.11	26.7	107.83	0	0.52	12.9387	100.937	-0.0311154	0	-0.460211	-0.0508739	0.142378	-0.039288	0.0025061	-0.00643747	0.0130252	-0.165567	-0.068572	-0.0884136	-0.00615225	-0.0140356	-0.0138562	-0.000334513	-0.000888335	-0.00835198	0.000771791	-0.00144975	-0.000292797	0.00326887	Soil
257	2023-05-26 07:00:00	0	7.11	26.7	107.83	0	0.52	15.5841	102.145	-0.0391287	0	-0.484911	-0.0572186	0.180134	-0.0490911	0.000640929	-0.00751824	-0.0372697	-0.204167	-0.0818516	-0.137465	-0.0154378	-0.0168338	-0.0155027	-0.000553054	-0.00108748	-0.0086842	0.000575475	-0.00101979	-0.000171042	0.00600277	Soil
258	2023-05-26 08:00:00	0	7.11	26.7	107.83	0	0.52	19.7548	100.188	-0.0544342	0	-0.565765	-0.0670007	0.204404	-0.0821523	-0.000162054	-0.00880524	0.0276452	-0.261884	-0.119722	-0.12015	-0.0301245	-0.0228408	-0.0169288	-0.000761091	-0.00120554	-0.00117466	0.00110022	-0.000123495	-0.000445774	0.00928953	Soil
259	2023-05-26 09:00:00	0	7.11	26.7	107.83	0	0.52	27.4968	92.7491	0.0165554	0	0.292707	0.00455214	0.555501	0.032609	0.00695453	0.00420456	0.00578804	0.142561	0.0466383	0.0499986	0.00639951	0.0186975	0.00287012	0.000576877	0.000792101	0.0123149	0.00490641	0.00290407	0.000389984	0.0236488	Soil
260	2023-05-26 10:00:00	0	7.11	26.7	107.83	0	0.52	23.165	95.7002	-0.0569167	0	-0.434045	-0.0441697	0.498034	-0.152416	0.0109413	-0.00364946	0.0175469	-0.178536	-0.131299	-0.181879	-0.0277263	-0.0143076	#N/A	#N/A	#N/A	#N/A	#N/A	#N/A	#N/A	#N/A	Soil
261	2023-05-26 11:00:00	0	7.11	26.7	107.83	0	0.52	23.5983	95.2881	-0.0669959	0	-0.827577	-0.0229731	0.584049	-0.218081	0.0119308	0.00173494	-0.00145952	-0.191404	-0.136992	-0.324807	-0.02562	-0.0094007	-0.00693285	-0.000491526	-0.00049935	0.0084011	0.0306514	0.00300017	-0.000197808	0.0322315	Soil
262	2023-05-26 12:00:00	0	7.11	26.7	107.83	0	0.52	23.7733	95.3797	-0.0795069	0	-0.768754	-0.0237109	0.650686	-0.243261	0.0092008	0.00239751	0.0264442	-0.125131	-0.163965	-0.197466	-0.0377678	-0.0088398	-0.00398026	-0.000962329	0.00225988	0.0772205	0.0561637	0.00333736	-0.00228469	0.0434053	Soil
263	2023-05-26 13:00:00	0	7.11	26.7	107.83	0	0.52	24.99	93.8463	-0.0817186	0	-0.718139	-0.0235104	0.761783	-0.259613	0.00696833	0.00269194	0.0147447	-0.116839	-0.103894	-0.243672	-0.0412525	-0.000465044	0.000962241	-0.00098398	0.00390067	0.183436	0.0650075	0.00380332	-0.00297977	0.064919	Soil
264	2023-05-26 14:00:00	0	7.11	26.7	107.83	0	0.52	25.2233	93.4824	-0.0761938	0	-0.93497	-0.0223453	0.887591	-0.231275	0.0015525	0.00207274	0.0162911	-0.119032	-0.00788697	-0.339028	-0.0607562	0.00715255	-0.00516964	-0.000794545	0.00417153	0.0326396	0.0468916	0.00296297	-0.00141109	0.0489109	Soil
265	2023-05-25 15:00:00	6.85	0	26.35	35.76	0.82	0.07	#N/A	#N/A	#N/A	14.41	#N/A	#N/A	#N/A	#N/A	#N/A	#N/A	#N/A	#N/A	#N/A	#N/A	#N/A	#N/A	#N/A	#N/A	#N/A	#N/A	#N/A	#N/A	#N/A	#N/A	Mass 1
266	2023-05-25 16:00:00	6.85	0	26.35	35.76	0.82	0.07	16.9184	99.8831	-0.0483083	14.41	-0.709848	-0.0440736	0.134992	-0.0960571	-0.0419415	-0.00870094	0.0170199	-0.298032	-0.124438	-0.0189217	-0.02398	-0.0215561	-0.0156345	-0.000524825	-0.00259025	0.207352	-0.00202427	0.00323821	-0.000735844	0.0031762	Mass 1
267	2023-05-25 17:00:00	6.85	0	26.35	35.76	0.82	0.07	16.135	100.993	-0.0496408	14.41	-0.46174	-0.0492827	0.118251	-0.105471	-0.03562	-0.0101262	0.0230335	-0.250974	-0.137558	-0.0201452	-0.0196626	-0.0250554	-0.0103528	-0.000545919	-0.00326513	0.137911	-0.00139449	0.00109146	-0.000680854	0.00343718	Mass 1
268	2023-05-25 18:00:00	6.85	0	26.35	35.76	0.82	0.07	15.7759	101.521	-0.0417042	14.41	-0.523594	-0.0458299	0.125376	-0.088041	-0.0325145	-0.00671552	-0.0635002	-0.247156	-0.140723	-0.028057	-0.0153947	-0.0237264	-0.0110978	-0.000469328	-0.00264719	0.0837142	-0.000993051	0.000731345	-0.000625452	0.0033158	Mass 1
269	2023-05-25 19:00:00	6.85	0	26.35	35.76	0.82	0.07	14.5063	100.786	-0.0460076	14.41	-0.533769	-0.0516531	0.0900483	-0.0974156	-0.0353255	-0.00461997	0.0128946	-0.264616	-0.14609	-0.0247325	-0.0165171	-0.0252247	-0.0154316	-0.000597988	-0.00230797	0.0273027	-0.000306929	0.000254576	-0.000649981	0.00337618	Mass 1
270	2023-05-25 20:00:00	6.85	0	26.35	35.76	0.82	0.07	13.7459	101.033	-0.0460834	14.41	-0.312585	-0.051562	0.0841257	-0.1045	-0.0333273	-0.0074634	0.0161851	-0.24149	-0.153788	-0.0215925	-0.0150851	-0.0268366	-0.010348	-0.000561328	-0.00226053	0.0497806	-0.00111933	0.000374679	-0.000452572	0.00361047	Mass 1
271	2023-05-25 21:00:00	6.85	0	26.35	35.76	0.82	0.07	13.1948	101.051	-0.0461506	14.41	-0.351957	-0.0488423	0.073683	-0.0995012	-0.0325738	-0.00859358	0.0157888	-0.222013	-0.141117	-0.0202766	-0.0125457	-0.024044	-0.00960386	-0.000624888	-0.00269221	0.0441279	-0.000608503	0.000597938	-0.00041377	0.00371571	Mass 1
272	2023-05-25 22:00:00	6.85	0	26.35	35.76	0.82	0.07	12.877	101.218	-0.0378915	14.41	-0.469321	-0.0466835	0.107187	-0.0771184	-0.0358723	-0.00724445	0.0167763	-0.193161	-0.105097	-0.0150857	-0.00971325	-0.0176098	-0.0114819	-0.000491055	-0.00144146	0.0387992	4.06987e-05	0.000155247	-0.00039321	0.00355167	Mass 1
273	2023-05-25 23:00:00	6.85	0	26.35	35.76	0.82	0.07	12.626	101.383	-0.042621	14.41	-0.506504	-0.0489592	0.0837322	-0.0869103	-0.0354374	-0.00710598	0.0140546	-0.206435	-0.104821	-0.0170803	-0.0106058	-0.017919	-0.01109	-0.000481819	-0.00224809	0.0393077	-6.85837e-05	0.00042679	-0.000324031	0.00349569	Mass 1
274	2023-05-26	6.85	0	26.35	35.76	0.82	0.07	12.2753	101.552	-0.0326509	14.41	-0.321323	-0.0442325	0.106196	-0.0702844	-0.0324758	-0.00760669	0.0201924	-0.167648	-0.0905706	-0.0156027	-0.00817145	-0.0152211	-0.00870822	-0.000416389	-0.00176648	0.0415168	0.000209922	4.15926e-05	-0.000303526	0.00362229	Mass 1
275	2023-05-26 01:00:00	6.85	0	26.35	35.76	0.82	0.07	12.125	101.603	-0.0326712	14.41	-0.36653	-0.0426998	0.111217	-0.0534054	-0.0315593	-0.00687915	-0.0017092	-0.159507	-0.083003	-0.0159137	-0.00875596	-0.0155537	-0.0100688	-0.00039093	-0.00174208	0.0415335	0.000110154	0.00024565	-0.000295743	0.00362267	Mass 1
276	2023-05-26 02:00:00	6.85	0	26.35	35.76	0.82	0.07	12.125	101.522	-0.0331959	14.41	-0.458003	-0.0460969	0.107978	-0.0415337	-0.0313728	-0.00485575	0.00530642	-0.166631	-0.0763015	-0.0175789	-0.00792206	-0.0148081	-0.0118336	-0.000462124	-0.00214278	0.0329717	-0.000473385	0.000371486	-0.000246574	0.00346011	Mass 1
277	2023-05-26 03:00:00	6.85	0	26.35	35.76	0.82	0.07	11.9326	101.674	-0.0329473	14.41	-0.423925	-0.0450924	0.119611	-0.0189541	-0.0329534	-0.00824685	0.0163398	-0.166877	-0.062586	-0.017547	-0.00739042	-0.0130963	-0.0104131	-0.000403222	-0.00174057	0.0222752	0.000174942	0.000289405	-0.000306094	0.00289908	Mass 1
278	2023-05-26 04:00:00	6.85	0	26.35	35.76	0.82	0.07	11.623	101.671	-0.0319578	14.41	-0.370437	-0.0429199	0.120182	-0.00824983	-0.0303893	-0.00752362	0.0118804	-0.171717	-0.0726005	-0.0153315	-0.00775801	-0.0140994	-0.0115015	-0.000381854	-0.00139543	0.02059	-0.000549032	0.000547935	-0.00038035	0.00306839	Mass 1
279	2023-05-26 05:00:00	6.85	0	26.35	35.76	0.82	0.07	12.2168	101.633	-0.0362995	14.41	-0.584149	-0.0441441	0.105106	-0.0340258	-0.0311623	-0.00719062	0.0191782	-0.190464	-0.0892136	-0.0195196	-0.00887964	-0.0161067	-0.0133306	-0.000390084	-0.00206608	0.0178389	-0.000304009	0.000485296	-0.000365152	0.00384508	Mass 1
280	2023-05-26 06:00:00	6.85	0	26.35	35.76	0.82	0.07	13.3951	101.304	-0.0397407	14.41	-0.551205	-0.046554	0.100519	-0.0339092	-0.032678	-0.00700189	0.0152134	-0.191818	-0.0949189	-0.0264398	-0.00903837	-0.0166194	-0.0139731	-0.000509286	-0.00124752	0.0188234	-0.000168071	-1.5694e-05	-0.000291207	0.00383758	Mass 1
281	2023-05-26 07:00:00	6.85	0	26.35	35.76	0.82	0.07	15.2332	101.895	-0.03632	14.41	-0.444696	-0.0419697	0.0892589	-0.0666232	-0.0266355	-0.00874032	-0.0543885	-0.20471	-0.0988211	-0.0166787	-0.00910675	-0.0179136	-0.0135268	-0.000414123	-0.00122718	0.00842298	-0.000314378	-1.28689e-05	-0.000269276	0.00375647	Mass 1
282	2023-05-26 08:00:00	6.85	0	26.35	35.76	0.82	0.07	16.8698	101.95	-0.0421896	14.41	-0.459293	-0.0462849	0.0788944	-0.0943353	-0.031156	-0.007485	0.0110206	-0.21294	-0.115306	-0.0259294	-0.00959747	-0.01876	-0.0113175	-0.000418794	-0.00169788	0.0177279	0.000388852	0.000655942	-0.000257626	0.00441342	Mass 1
283	2023-05-26 09:00:00	6.85	0	26.35	35.76	0.82	0.07	18.8733	100.057	-0.0452165	14.41	-0.410921	-0.044262	0.0666344	-0.112854	-0.0250474	-0.00869416	0.00554882	-0.235103	-0.115261	-0.0329249	-0.011429	-0.0185377	-0.0092278	-0.000506572	-0.00170467	0.0180652	0.000729642	0.00108324	-0.000233581	0.00469344	Mass 1
284	2023-05-26 10:00:00	6.85	0	26.35	35.76	0.82	0.07	22.7019	96.0814	-0.0468747	14.41	-0.403466	-0.0454199	0.0729152	-0.119188	-0.0264448	-0.00651862	-0.0772009	-0.239193	-0.115104	-0.0385764	-0.0120602	-0.0181084	-0.010339	-0.000578147	-0.00159376	0.0187656	0.000157754	0.00127397	-0.000199435	0.00589488	Mass 1
285	2023-05-26 11:00:00	6.85	0	26.35	35.76	0.82	0.07	24.978	94.1333	-0.0425499	14.41	-0.359167	-0.0443474	0.0904252	-0.105504	-0.0291958	-0.00570001	0.021555	-0.220318	-0.118381	-0.0406441	-0.0122095	-0.0190545	-0.0115031	-0.000780596	-0.00210646	0.0203714	0.000328957	0.000550149	-0.000340497	0.00695841	Mass 1
286	2023-05-26 12:00:00	6.85	0	26.35	35.76	0.82	0.07	30.3898	88.5657	-0.0529158	14.41	-0.349272	-0.0450906	0.103711	-0.136045	-0.0278528	-0.00746107	0.0311017	-0.239207	-0.0944987	-0.0386403	-0.0117994	-0.0175598	-0.00896053	-0.00076102	-0.00111905	0.0291523	0.00645405	0.00145044	-0.000123729	0.0223272	Mass 1
287	2023-05-26 13:00:00	6.85	0	26.35	35.76	0.82	0.07	27.6595	92.3473	-0.0631442	14.41	-0.532114	-0.0519746	0.102672	-0.144112	-0.0382965	-0.00913943	0.0239241	-0.274918	-0.103064	-0.105494	-0.0201019	-0.0199915	-0.0114326	-0.000829911	-0.00131866	0.0270045	0.00873236	0.000989847	-0.0003124	0.0175988	Mass 1
288	2023-05-26 14:00:00	6.85	0	26.35	35.76	0.82	0.07	24.7029	95.4522	-0.0677691	14.41	-0.562153	-0.0530601	0.1554	-0.157362	-0.0177144	-0.00812256	0.0233383	-0.271079	-0.132308	-0.115806	-0.0228214	-0.0236167	-0.00932389	-0.000853551	-0.00116987	0.0320271	0.00677423	0.000855579	-0.000263751	0.0178515	Mass 1
289	2023-05-25 15:00:00	12.3	0	17.16	19.47	0	0.33	#N/A	#N/A	-0.0331097	22.87	0.306743	-0.00720335	0.00202226	-0.102112	0.000237931	0.000861677	0.00174763	-0.0148962	-0.0817151	0.0248137	-0.0106536	-0.0100983	-0.00251306	-0.000485038	-0.000609227	0.00525927	-0.000717033	0.000815318	0.00117686	-0.00464845	Mass 2
290	2023-05-25 16:00:00	12.3	0	17.16	19.47	0	0.33	17.38	98.7946	-0.0432435	22.87	-0.0576807	-0.0344625	0.498914	-0.131799	-0.00211286	-0.00213084	0.02278	0.0229796	-0.12756	-0.0969861	-0.0224294	-0.0100903	-0.00764588	-0.000905659	-0.00022391	-0.00293594	-0.000634043	0.00198611	0.00147621	-9.83145e-05	Mass 2
291	2023-05-25 17:00:00	12.3	0	17.16	19.47	0	0.33	16.6543	100.003	-0.0378203	22.87	-0.266574	-0.0478706	0.576675	-0.0951262	-0.00335874	-0.00341988	0.0231184	0.022465	-0.119499	-0.102444	-0.0168211	-0.0108483	-0.0114836	-0.000514648	-0.000891054	-0.00479892	0.000300411	0.000996341	0.000625847	-0.00300048	Mass 2
292	2023-05-25 18:00:00	12.3	0	17.16	19.47	0	0.33	16.2992	100.608	-0.0337499	22.87	-0.265598	-0.0531214	0.584461	-0.0863492	0.00103142	-0.0115712	-0.055551	0.02171	-0.118706	-0.0726404	-0.0197867	-0.0112918	-0.0142688	-0.000595276	-0.00111612	-0.00555459	4.60849e-05	0.000640285	0.000457863	-0.00525096	Mass 2
293	2023-05-25 19:00:00	12.3	0	17.16	19.47	0	0.33	14.9513	100.482	-0.0371317	22.87	-0.0729873	-0.0536532	0.329919	-0.0926179	0.000611675	-0.0100524	0.0301636	-0.159283	-0.111009	-0.0248974	-0.014013	-0.0145522	-0.0182468	-0.000601924	-0.00102242	-0.0991777	-0.000248035	-0.0012847	0.000347803	-0.00447305	Mass 2
294	2023-05-25 20:00:00	12.3	0	17.16	19.47	0	0.33	14.501	100.527	-0.0288607	22.87	-0.0308385	-0.0495741	0.285371	-0.0756391	0.0023299	-0.0085877	0.0152825	-0.104493	-0.105688	-0.013242	-0.00851023	-0.0142532	-0.00964321	-0.000570119	-0.000906561	-0.00445393	-0.000608193	-3.11554e-05	0.000218581	-0.00376688	Mass 2
295	2023-05-25 21:00:00	12.3	0	17.16	19.47	0	0.33	13.57	100.698	-0.0265657	22.87	-0.0998289	-0.0494801	0.269651	-0.0584662	0.000353812	-0.00751334	0.0192896	-0.0850343	-0.093764	-0.0123026	-0.00690957	-0.0116012	-0.0105163	-0.000381535	-0.000897692	-0.00482299	7.83837e-05	-6.06776e-06	0.000187132	-0.00237021	Mass 2
296	2023-05-25 22:00:00	12.3	0	17.16	19.47	0	0.33	13.672	100.952	-0.0286788	22.87	-0.0635346	-0.0463803	0.248781	-0.0655907	0.00211349	-0.00839634	0.0282008	-0.0883217	-0.0934459	-0.014016	-0.0067017	-0.0156206	-0.00934791	-0.000470426	-0.00115705	-0.00400352	-0.000580215	-0.000400593	8.39448e-05	-0.00230431	Mass 2
297	2023-05-25 23:00:00	12.3	0	17.16	19.47	0	0.33	13.69	101.103	-0.0287756	22.87	-0.133615	-0.0479203	0.231155	-0.0589466	0.00141774	-0.00802137	0.00933827	-0.0926064	-0.0886713	-0.0134877	-0.00682224	-0.0143999	-0.0105387	-0.000486587	-0.000931185	-0.00500829	4.45835e-06	0.000135467	0.000176465	-0.00229607	Mass 2
298	2023-05-26	12.3	0	17.16	19.47	0	0.33	12.6054	101.321	-0.0243257	22.87	-0.0241686	-0.0467251	0.220251	-0.0571145	0.00305307	-0.0044472	0.0207823	-0.0829575	-0.0874649	-0.0117152	-0.00646372	-0.0138364	-0.00844812	-0.00053562	-0.000606953	-0.00400045	-0.000138314	-0.00019705	8.50761e-05	-0.00226236	Mass 2
299	2023-05-26 01:00:00	12.3	0	17.16	19.47	0	0.33	12.568	101.403	-0.0272439	22.87	-0.0116737	-0.0478275	0.216134	-0.0569147	0.00106101	-0.00273503	0.0374139	-0.0939289	-0.0861799	-0.0130026	-0.00700135	-0.0132243	-0.00810644	-0.000522355	-0.000902448	-0.000906071	-0.000381119	-1.11267e-06	0.000134286	-0.00193404	Mass 2
300	2023-05-26 02:00:00	12.3	0	17.16	19.47	0	0.33	12.568	101.448	-0.029026	22.87	-0.0784301	-0.0473997	0.21248	-0.0519557	0.00257076	-0.0029045	0.0194031	-0.0878028	-0.0789994	-0.0110873	-0.00623733	-0.013027	-0.0103305	-0.000454213	-0.000795421	-0.00355449	-0.000517495	-0.00048422	7.20281e-05	-0.0018332	Mass 2
301	2023-05-26 03:00:00	12.3	0	17.16	19.47	0	0.33	12.6171	101.455	-0.0343813	22.87	-0.106502	-0.0495969	0.196652	-0.054079	0.00127863	-0.00451704	0.0254193	-0.11075	-0.083414	-0.0102444	-0.00720366	-0.0137053	-0.00828606	-0.000566925	-0.000459121	-0.00320785	3.74891e-05	-0.000632737	4.3489e-05	-0.00177836	Mass 2
302	2023-05-26 04:00:00	12.3	0	17.16	19.47	0	0.33	12.66	101.491	-0.0240374	22.87	-0.0373217	-0.0470258	0.209344	-0.0438915	0.00223601	-0.00377797	0.0229793	-0.0709671	-0.0752473	-0.00980011	-0.00435234	-0.0122312	-0.00937139	-0.000403985	-0.00103885	-0.00301774	-9.70801e-05	-0.000162201	0.000145285	-0.00157598	Mass 2
303	2023-05-26 05:00:00	12.3	0	17.16	19.47	0	0.33	12.7798	101.536	-0.0256821	22.87	-0.137349	-0.045469	0.23539	-0.0385747	0.00140316	-0.00516439	0.0101159	-0.0660266	-0.069682	-0.0226163	-0.0035765	-0.0110691	-0.00796261	-0.000306988	-0.000494309	-0.00466705	-0.000211646	-0.000835513	0.000320308	-0.00133383	Mass 2
304	2023-05-26 06:00:00	12.3	0	17.16	19.47	0	0.33	13.9743	101.049	-0.0261174	22.87	-0.138973	-0.0490515	0.282483	-0.0377226	0.00247959	-0.00647459	0.0153055	-0.0660423	-0.0756802	-0.0639763	-0.0049992	-0.0113425	-0.0125246	-0.000333945	-0.000955087	-0.00555217	0.000117257	-0.000993834	0.000338445	-0.00152962	Mass 2
305	2023-05-26 07:00:00	12.3	0	17.16	19.47	0	0.33	15.873	102.049	-0.0367641	22.87	-0.12918	-0.0558786	0.277786	-0.0481278	0.000417358	-0.00721132	-0.0426491	-0.141453	-0.0879204	-0.104622	-0.0130713	-0.0140812	-0.0130266	-0.000497062	-0.000989854	-0.00681371	-0.00105763	0.000767445	0.000586666	-0.000969656	Mass 2
306	2023-05-26 08:00:00	12.3	0	17.16	19.47	0	0.33	18.8801	99.3017	-0.0452107	22.87	0.0576897	-0.0650202	0.581087	-0.0802357	0.00107412	-0.00841337	0.0275939	-0.0953741	-0.121858	-0.0869937	-0.0275652	-0.0153708	-0.0144647	-0.000694391	-0.000851241	-0.00130765	-0.000952492	0.00155285	0.000741839	-0.00264265	Mass 2
307	2023-05-26 09:00:00	12.3	0	17.16	19.47	0	0.33	20.2934	96.667	0.023272	22.87	0.778705	0.00563979	0.859821	0.0373395	0.00556084	0.00352142	0.0124506	0.296195	0.0419616	0.0759668	0.00998329	0.0248189	0.00643281	0.000573391	0.00118268	0.0100969	0.000646293	0.00365204	0.00227106	0.00543908	Mass 2
308	2023-05-26 10:00:00	12.3	0	17.16	19.47	0	0.33	22.998	92.7579	-0.0506472	22.87	0.628615	-0.0428814	1.08821	-0.149426	0.00413461	-0.00315197	0.0213598	0.0547157	-0.130834	-0.175805	-0.0225938	-0.00203447	#N/A	#N/A	#N/A	#N/A	#N/A	#N/A	#N/A	#N/A	Mass 2
309	2023-05-26 11:00:00	12.3	0	17.16	19.47	0	0.33	23.6637	91.3354	-0.056758	22.87	0.532145	-0.0204552	1.31666	-0.213968	0.00685161	0.00172072	-0.00159185	0.0817883	-0.146584	-0.288935	-0.0218773	0.00541428	-0.002032	-0.000591306	-4.43441e-05	0.00368571	0.00115705	0.00869232	0.00362896	0.00673363	Mass 2
310	2023-05-26 12:00:00	12.3	0	17.16	19.47	0	0.33	22.6612	92.9357	-0.072409	22.87	-0.1105	-0.0216423	1.23167	-0.240829	0.00633599	0.00225095	0.0326269	0.123436	-0.192502	-0.164554	-0.0353486	-0.00102716	0.000327452	-0.00129693	-0.00190334	0.00718716	-0.0015204	0.00587879	0.00282389	0.00511944	Mass 2
311	2023-05-26 13:00:00	12.3	0	17.16	19.47	0	0.33	22.8324	92.4739	-0.0738824	22.87	-0.133034	-0.0224302	1.55926	-0.255846	0.00655091	0.00137199	0.0150345	0.196926	-0.199338	-0.214049	-0.0399951	0.00498714	-0.00189819	-0.000993678	-0.00123713	0.00855535	-0.000673756	0.00508144	-5.37329e-05	-0.00969102	Mass 2
312	2023-05-26 14:00:00	12.3	0	17.16	19.47	0	0.33	23.1547	91.7498	-0.0685617	22.87	-0.454283	-0.0220592	1.27846	-0.226785	-0.000663311	0.00230603	0.0303594	0.0610086	-0.133457	-0.292196	-0.0545893	-0.000433534	-0.00213302	-0.000977411	-5.67067e-05	0.00694018	-0.000640166	0.00457133	0.0011446	-0.000118165	Mass 2
313	2023-05-25 15:00:00	25.3	0	16.44	27.43	0	0.14	#N/A	#N/A	-0.0333026	20.94	0.571752	-0.0036023	0.039928	-0.107111	0.00984604	0.00201742	0.00457695	0.0435036	-0.0826744	0.0616488	-0.0106374	-0.0122743	-0.00407789	0.027725	-0.000250314	0.00260965	-0.000812498	0.000908362	0.00982451	-0.00531637	Mass 3
314	2023-05-25 16:00:00	25.3	0	16.44	27.43	0	0.14	19.5818	95.9637	-0.0402479	20.94	0.566221	-0.0350395	-0.0382353	-0.11787	0.00364718	-0.00180733	0.0225001	-0.096119	-0.105233	-0.119221	-0.0245403	-0.019783	-0.00915512	0.0465228	0.000763919	-0.00438737	0.000372832	0.00277808	0.00985004	0.00277191	Mass 3
315	2023-05-25 17:00:00	25.3	0	16.44	27.43	0	0.14	17.2077	99.113	-0.0412614	20.94	-0.140783	-0.050461	-0.0536751	-0.098406	0.00188888	-0.00348534	0.0223605	-0.175769	-0.0941976	-0.15458	-0.0199392	-0.0226494	-0.0131854	0.0418244	-5.38705e-05	-0.00957105	0.000731906	0.000932752	0.00660621	-0.00135294	Mass 3
316	2023-05-25 18:00:00	25.3	0	16.44	27.43	0	0.14	16.1641	100.356	-0.0381396	20.94	-0.266637	-0.0563484	-0.0800588	-0.0848996	0.00593725	-0.0119448	-0.0574791	-0.223888	-0.110208	-0.138731	-0.0238452	-0.0249299	-0.0169044	0.0343858	-0.000460501	-0.016175	0.000726563	0.000272721	0.00483961	-0.00372103	Mass 3
317	2023-05-25 19:00:00	25.3	0	16.44	27.43	0	0.14	14.4617	100.42	-0.0387061	20.94	0.0417338	-0.0545117	-0.0872237	-0.0743933	0.00215728	-0.00975652	0.0309785	-0.235229	-0.0930675	-0.0327826	-0.0146825	-0.0210866	-0.0194807	0.0271629	-0.000152219	-0.108549	0.000363084	-0.000857202	0.00486031	-0.00081877	Mass 3
318	2023-05-25 20:00:00	25.3	0	16.44	27.43	0	0.14	13.4931	100.533	-0.0290205	20.94	0.0680562	-0.0502712	-0.0677623	-0.0576815	0.00344011	-0.00817972	0.0149392	-0.161577	-0.0996083	-0.018695	-0.009493	-0.019982	-0.010759	0.0197785	-0.00042209	-0.00687892	-0.000545827	-0.000245133	0.00338091	-0.00125804	Mass 3
319	2023-05-25 21:00:00	25.3	0	16.44	27.43	0	0.14	12.9504	100.958	-0.027489	20.94	-0.0215743	-0.0502516	-0.0633958	-0.0409847	0.000989227	-0.00748007	0.0198448	-0.142229	-0.0817088	-0.0170967	-0.00799952	-0.0170398	-0.0115694	0.0156634	-0.000742489	-0.00774625	0.000272854	-0.000227471	0.00256818	-0.0019497	Mass 3
320	2023-05-25 22:00:00	25.3	0	16.44	27.43	0	0.14	12.608	101.213	-0.0274087	20.94	-0.0020181	-0.0470877	-0.0662659	-0.0510139	0.00299831	-0.00828644	0.0285174	-0.14186	-0.0776474	-0.0177083	-0.00795419	-0.019719	-0.0103864	0.0138785	-0.000899148	-0.00676838	-0.000447312	-0.000525144	0.0022096	-0.00146993	Mass 3
321	2023-05-25 23:00:00	25.3	0	16.44	27.43	0	0.14	12.3157	101.283	-0.0290692	20.94	-0.0722932	-0.0488536	-0.0755494	-0.0479661	0.00253287	-0.00795852	0.00929444	-0.148314	-0.0771923	-0.017174	-0.0083269	-0.0192198	-0.0113322	0.0117346	-0.00104016	-0.00782108	0.000175649	-0.000204097	0.00200755	-0.00154903	Mass 3
322	2023-05-26	25.3	0	16.44	27.43	0	0.14	12.107	101.385	-0.0202361	20.94	0.0281413	-0.0466398	-0.0532349	0.0170756	0.00158148	-0.00411324	0.0231387	-0.12927	0.0572931	-0.0157255	-0.00628103	-0.00539312	-0.00934028	0.0125689	-0.000234729	-0.00700457	0.000233491	-0.000337348	0.00198826	-0.00168724	Mass 3
323	2023-05-26 01:00:00	25.3	0	16.44	27.43	0	0.14	11.8148	101.399	-0.0265983	20.94	0.0532253	-0.0484252	-0.0751389	-0.024903	0.000254222	-0.00247541	0.0377403	-0.145443	-0.0646094	-0.017862	-0.00814645	-0.0164549	-0.00960192	0.0111167	-0.000559619	-0.00550294	8.11754e-05	-0.000290383	0.0018602	-0.00137434	Mass 3
324	2023-05-26 02:00:00	25.3	0	16.44	27.43	0	0.14	11.606	101.523	-0.0283437	20.94	-0.0264984	-0.0483269	-0.070555	-0.0311652	0.00276802	-0.00283275	0.0196507	-0.135093	-0.0732908	-0.0157961	-0.00750875	-0.0178967	-0.0114275	0.0100073	-0.000537646	-0.00797458	-0.000114635	-0.000333424	0.00142409	-0.00129001	Mass 3
325	2023-05-26 03:00:00	25.3	0	16.44	27.43	0	0.14	11.606	101.669	-0.0329053	20.94	-0.0474555	-0.0506545	-0.0823476	-0.0350659	0.00119936	-0.00478219	0.0256719	-0.162728	-0.0720781	-0.0142744	-0.00839637	-0.0178396	-0.00966088	0.00978128	-0.000395803	-0.00715725	0.000112405	-0.00082033	0.00138561	-0.00123096	Mass 3
326	2023-05-26 04:00:00	25.3	0	16.44	27.43	0	0.14	11.3717	101.774	-0.0267258	20.94	0.0304415	-0.0477449	-0.058764	-0.0282485	0.00217967	-0.00338785	0.0244462	-0.115449	-0.0650918	-0.0133394	-0.00497178	-0.016411	-0.010236	0.0116163	-0.000414274	-0.00634342	0.000402315	-0.000372194	0.00154423	-0.00100478	Mass 3
327	2023-05-26 05:00:00	25.3	0	16.44	27.43	0	0.14	11.773	101.749	-0.0251855	20.94	-0.0862549	-0.046043	-0.047032	0.0166262	-0.000282876	-0.00516656	0.0101655	-0.113435	-0.053925	-0.0380559	-0.00467229	-0.0151413	-0.0092448	0.0120517	-0.000242457	-0.00970718	4.72614e-05	-0.000853873	0.00188223	-0.000591632	Mass 3
328	2023-05-26 06:00:00	25.3	0	16.44	27.43	0	0.14	13.0005	101.438	-0.0270522	20.94	-0.0990707	-0.0505194	-0.0552656	-0.00273946	0.00229462	-0.0064756	0.0152536	-0.134628	-0.0620807	-0.0941163	-0.00611254	-0.0167857	-0.0146015	0.0154308	-0.000832691	-0.0141583	0.000123468	-0.00110547	0.00249893	-0.000699909	Mass 3
329	2023-05-26 07:00:00	25.3	0	16.44	27.43	0	0.14	15.9054	101.4	-0.0344584	20.94	0.116127	-0.0572275	-0.062736	-0.0183007	0.00282188	-0.00720939	-0.0427397	-0.16932	-0.0716642	-0.140228	-0.0160069	-0.0201679	-0.0148644	0.0192709	-0.00104105	-0.013448	-0.000871801	0.000461548	0.00372386	0.00111369	Mass 3
330	2023-05-26 08:00:00	25.3	0	16.44	27.43	0	0.14	19.0844	99.3881	-0.0443902	20.94	0.495562	-0.0668521	-0.100149	-0.0570641	0.00500089	-0.00858672	0.0276891	-0.192767	-0.109971	-0.11867	-0.0306306	-0.0268318	-0.0162864	0.0277224	-0.000605921	-0.00630365	-0.000937785	0.00231914	0.00549777	-0.000663195	Mass 3
331	2023-05-26 09:00:00	25.3	0	16.44	27.43	0	0.14	20.7695	95.1155	0.0246057	20.94	1.32818	0.00365136	0.0995442	0.0567364	0.00753353	0.00391907	0.0109764	0.18469	0.0558066	0.0315502	0.00510918	0.0100189	0.00435794	0.0252811	0.00156005	0.00381837	0.00125439	0.00506627	0.00899173	0.00930837	Mass 3
332	2023-05-26 10:00:00	25.3	0	16.44	27.43	0	0.14	22.5117	93.5328	-0.0539682	20.94	0.460873	-0.0454136	-0.114075	-0.118294	0.00798883	-0.00396913	0.0174017	-0.171086	-0.136656	-0.244984	-0.030058	-0.0274284	#N/A	#N/A	#N/A	#N/A	#N/A	#N/A	#N/A	#N/A	Mass 3
333	2023-05-26 11:00:00	25.3	0	16.44	27.43	0	0.14	39.8757	73.2215	-0.0257283	20.94	4.92325	-0.0180683	0.684239	-0.0885729	0.0251793	0.084132	0.260056	0.274418	-0.00684413	-0.262539	0.00145238	0.104189	0.013018	0.106498	0.00391851	0.000136646	0.00517932	0.0317568	0.0258481	0.0364364	Mass 3
334	2023-05-26 12:00:00	25.3	0	16.44	27.43	0	0.14	34.4381	77.4178	-0.0530248	20.94	3.00864	-0.021798	0.0106598	-0.237723	0.0449753	0.00249903	0.0455601	0.0937179	-0.211759	-0.189058	-0.0280793	-0.029462	-0.00257151	0.129366	0.000320446	-0.00218521	0.000709661	0.0119008	0.0203506	0.0368102	Mass 3
335	2023-05-26 13:00:00	25.3	0	16.44	27.43	0	0.14	29.6275	78.3973	-0.0671723	20.94	1.08898	-0.0237014	-0.0198272	-0.257893	0.0320248	0.00200957	0.021573	-0.0358792	-0.211802	-0.260368	-0.0412083	-0.0297232	-0.00391555	0.10903	0.00101132	-0.00301439	0.00140748	0.00693707	0.0145796	0.011429	Mass 3
336	2023-05-26 14:00:00	25.3	0	16.44	27.43	0	0.14	29.536	77.1972	-0.0628799	20.94	0.188063	-0.0234693	-0.0242909	-0.236434	0.0224438	0.0026381	0.0351093	-0.104215	-0.191975	-0.345681	-0.0581331	-0.0330266	-0.00506837	0.114757	0.00205583	-0.00796975	0.000507742	0.00579136	0.010565	0.00570548	Mass 3
337	2023-05-25 15:00:00	23.31	0	13.78	36.78	0	0.45	#N/A	#N/A	-0.0371961	51.44	0.569867	-0.00858161	-0.00446249	-0.134515	0.000876164	0.00158279	0.00429833	0.379159	-0.0708544	0.057897	-0.0165156	-0.00757071	-0.00385209	0.00404755	0.00819318	0.00395764	0.00257597	0.00581785	0.00203377	-0.00267861	Mass 4
338	2023-05-25 16:00:00	23.31	0	13.78	36.78	0	0.45	18.0352	98.4172	-0.0378651	51.44	0.22776	-0.0308031	-0.0413702	-0.10713	-0.00245455	-0.00191007	0.0382147	0.257866	-0.0449116	-0.0360302	-0.0185396	-0.0103087	-0.00784205	0.0144142	0.00584615	0.00044988	0.00206759	0.00559636	0.00216758	0.00368284	Mass 4
339	2023-05-25 17:00:00	23.31	0	13.78	36.78	0	0.45	16.581	99.7964	-0.0347516	51.44	0.0402367	-0.0454054	-0.015187	-0.0942078	-0.00154846	-0.00260735	0.039615	0.113629	-0.072805	-0.0425792	-0.0128611	-0.0154538	-0.0122842	0.0208703	0.0036987	-0.00318309	0.00232294	0.00404714	0.00143375	0.00911059	Mass 4
340	2023-05-25 18:00:00	23.31	0	13.78	36.78	0	0.45	16.3716	100.424	-0.0327333	51.44	-0.110658	-0.0526986	-0.0616105	-0.087558	0.00253799	-0.0111221	-0.0479202	-0.00410126	-0.0868912	-0.0544298	-0.019178	-0.018137	-0.0154898	0.0322194	0.0025791	-0.00931402	0.00188767	0.00404661	0.000926893	0.00179148	Mass 4
341	2023-05-25 19:00:00	23.31	0	13.78	36.78	0	0.45	14.9191	100.186	-0.0340788	51.44	0.0979198	-0.0529699	-0.0813569	-0.096175	0.0016823	-0.00969126	0.0339564	-0.0822458	-0.0911919	-0.000146183	-0.0117892	-0.0154836	-0.0192579	0.0298603	0.00155545	-0.104599	0.00149075	0.00154938	0.000718439	0.00428983	Mass 4
342	2023-05-25 20:00:00	23.31	0	13.78	36.78	0	0.45	13.7519	100.282	-0.0260159	51.44	0.135893	-0.0489456	-0.0551862	-0.0774921	0.00315711	-0.00789055	0.0180047	-0.0232957	-0.0824321	0.0104172	-0.00509628	-0.0138983	-0.00989921	0.0273237	0.00136697	-0.0028375	0.000592501	0.00289532	0.000733013	0.00218912	Mass 4
343	2023-05-25 21:00:00	23.31	0	13.78	36.78	0	0.45	13.7118	100.615	-0.0239025	51.44	0.0350215	-0.0486874	-0.0495441	-0.0595066	0.000758978	-0.0068448	0.0215932	-0.0145092	-0.0746025	0.00908393	-0.00436752	-0.0128718	-0.0109812	0.0240841	0.000585234	-0.00305417	0.00110614	0.00255523	0.000633863	0.000193209	Mass 4
344	2023-05-25 22:00:00	23.31	0	13.78	36.78	0	0.45	13.2861	100.706	-0.0263548	51.44	0.0721546	-0.0459797	-0.0526738	-0.0588712	0.00245885	-0.00811459	0.0312963	-0.015172	-0.0739683	0.00613483	-0.00373385	-0.0164936	-0.00977011	0.0224355	-3.00682e-06	-0.00287454	0.000758794	0.00199266	0.000514788	0.000876241	Mass 4
345	2023-05-25 23:00:00	23.31	0	13.78	36.78	0	0.45	12.572	100.9	-0.0240809	51.44	-0.0162337	-0.0475731	-0.0597287	-0.0587218	0.00184708	-0.00779958	0.0110775	-0.0266942	-0.0707941	0.00489052	-0.00438278	-0.0162452	-0.0107218	0.0191736	0.000194727	-0.004484	0.00159193	0.00225146	0.000492052	0.000762174	Mass 4
346	2023-05-26	23.31	0	13.78	36.78	0	0.45	12.6552	100.945	-0.0224921	51.44	0.088953	-0.0461327	-0.0522245	-0.0560346	0.00339063	-0.00414394	0.0217348	-0.0179169	-0.0664048	0.00536932	-0.00418205	-0.0148811	-0.00893463	0.0184704	0.000810778	-0.00352158	0.00101752	0.00197151	0.00039705	0.000461524	Mass 4
347	2023-05-26 01:00:00	23.31	0	13.78	36.78	0	0.45	12.7	101.385	-0.0251925	51.44	0.11638	-0.0472904	-0.0609575	-0.0564524	0.00137807	-0.00238587	0.0391388	-0.031031	-0.0689413	0.00383194	-0.00541446	-0.0149219	-0.00870064	0.0178897	0.00038929	-0.00187562	0.00116846	0.00230085	0.000480816	0.000962917	Mass 4
348	2023-05-26 02:00:00	23.31	0	13.78	36.78	0	0.45	12.7	101.073	-0.0274756	51.44	0.0301438	-0.0472991	-0.0548704	-0.0519456	0.00278862	-0.00239067	0.0199691	-0.0271762	-0.0629809	0.00439612	-0.00435456	-0.0147025	-0.0110921	0.0167915	0.000826118	-0.00437722	0.000259356	0.00186414	0.000391184	0.00052648	Mass 4
349	2023-05-26 03:00:00	23.31	0	13.78	36.78	0	0.45	12.6246	101.222	-0.0322427	51.44	0.0117824	-0.0494354	-0.0678252	-0.0528801	0.00142603	-0.00483091	0.0262805	-0.0553532	-0.0681954	0.00572116	-0.00594962	-0.0159034	-0.00898984	0.0158605	0.00103206	-0.00374516	0.000667183	0.00106195	0.000324329	0.000304977	Mass 4
350	2023-05-26 04:00:00	23.31	0	13.78	36.78	0	0.45	11.8518	101.198	-0.022173	51.44	0.0671192	-0.0471318	-0.0479625	-0.0445235	0.0021588	-0.00361436	0.0255246	-0.0131895	-0.0586999	0.00715746	-0.00321056	-0.013625	-0.0101279	0.0156767	0.000227568	-0.00316027	0.000919052	0.00160667	0.000465594	0.000512548	Mass 4
351	2023-05-26 05:00:00	23.31	0	13.78	36.78	0	0.45	12.6917	101.297	-0.0245897	51.44	0.00351057	-0.0451748	-0.0338447	-0.0389496	0.00175505	-0.00460322	0.0129418	0.0112792	-0.048628	-0.00460393	-0.00231709	-0.0124226	-0.00899461	0.0171193	0.00126083	-0.00535487	0.00108171	0.00150729	0.000577317	0.00156864	Mass 4
352	2023-05-26 06:00:00	23.31	0	13.78	36.78	0	0.45	13.9969	101.102	-0.0242043	51.44	-0.0344804	-0.0483596	-0.0286802	-0.0371973	0.00223747	-0.00587098	0.019783	0.0322193	-0.0451351	-0.0404664	-0.00263558	-0.013502	-0.0138383	0.0164802	0.000250653	-0.00812935	0.00200082	0.00157788	0.000776914	0.00319654	Mass 4
353	2023-05-26 07:00:00	23.31	0	13.78	36.78	0	0.45	16.0475	102.098	-0.0324845	51.44	0.0367306	-0.0552616	-0.0459263	-0.0467163	0.0008469	-0.00706941	-0.041823	0.02481	-0.0506188	-0.0825472	-0.0110917	-0.0164204	-0.0147218	0.01646	0.00068159	-0.00797	0.000934275	0.00265696	0.00116977	0.00779523	Mass 4
354	2023-05-26 08:00:00	23.31	0	13.78	36.78	0	0.45	19.7984	100.74	-0.0330007	51.44	0.938046	-0.0616009	0.0569558	-0.0771477	0.00133404	-0.00692837	0.0320214	0.145133	-0.065343	-0.012293	-0.0231296	-0.0212854	-0.0157972	0.0145825	0.000888918	0.00233841	0.00195332	0.00546002	0.00139977	0.00875868	Mass 4
355	2023-05-26 09:00:00	23.31	0	13.78	36.78	0	0.45	22.1564	97.3772	0.0328921	51.44	1.64757	0.00835767	0.195159	0.0385298	0.00495784	0.00481442	0.0182351	0.575232	0.13142	0.141239	0.0136757	0.0182669	0.00541196	0.0188622	0.00396508	0.014536	0.00845906	0.00960815	0.00333728	0.0308059	Mass 4
356	2023-05-26 10:00:00	23.31	0	13.78	36.78	0	0.45	23.1214	94.0597	-0.0435023	51.44	0.967974	-0.0398992	-0.00930447	-0.143374	0.00339302	-0.00302585	0.028153	0.257906	-0.0444786	-0.12352	-0.0207397	-0.0170768	#N/A	#N/A	#N/A	#N/A	#N/A	#N/A	#N/A	#N/A	Mass 4
357	2023-05-26 11:00:00	23.31	0	13.78	36.78	0	0.45	22.594	95.1827	-0.0503933	51.44	0.82076	-0.0153229	0.177076	-0.206759	0.00694524	0.00347372	0.0122541	0.27296	-0.0604964	-0.179591	-0.0152337	-0.0124336	-0.0054585	0.0306374	0.00626535	0.00758658	0.0253491	0.0123403	0.00682507	0.0239638	Mass 4
358	2023-05-26 12:00:00	23.31	0	13.78	36.78	0	0.45	22.7024	95.2889	-0.0645829	51.44	0.870252	-0.0180339	-0.0139753	-0.234318	0.00658805	0.00355399	0.0515501	0.275553	0.0386971	-0.0626534	-0.0290177	-0.00536388	-0.00482998	0.0305685	0.0063521	0.00758476	0.027831	0.0109381	0.00342525	0.144234	Mass 4
359	2023-05-26 13:00:00	23.31	0	13.78	36.78	0	0.45	24.5885	94.2522	-0.0638785	51.44	1.49529	-0.0177015	0.109952	-0.24114	0.00599227	0.0032543	0.0290852	0.328573	0.0154932	-0.106835	-0.0334126	-0.0106946	-0.00613791	0.0333898	0.00719909	0.0105448	0.0266141	0.0130453	0.000960706	0.100121	Mass 4
360	2023-05-26 14:00:00	23.31	0	13.78	36.78	0	0.45	25.2154	92.9497	-0.0589722	51.44	1.06584	-0.0177118	0.102227	-0.219518	0.000834416	0.0039088	0.0647345	0.343347	-0.0285078	-0.201553	-0.0475845	-0.0183599	-0.00491323	0.0408248	0.00898617	0.00542478	0.0127974	0.0116209	0.00148632	0.0502199	Mass 4
