# Supplementary material for: Litter biomass as a driver of soil VOC fluxes in a Mediterranean forest
Source: Copernicus journal article supplement (doi:10.5194/egusphere-2025-54), 2025-01-23
Supplement: Supplementary file 1 [file egusphere-2025-54-supplement.zip]

**Litter biomass as a driver of soil VOC fluxes in a Mediterranean forest**

Manon Rocco<sup>1,2</sup>, Julien Kammer<sup>1</sup>, Mathieu Santonja<sup>2</sup>, Brice Temime-Roussel<sup>1</sup>, Cassandra Saignol<sup>2</sup>, Caroline Lecareux<sup>2</sup>, Etienne Quivet<sup>1</sup>, Henri Wortham<sup>1</sup>, Elena Ormeno<sup>2</sup>

<sup>1</sup> Aix Marseille Univ, CNRS, LCE, Marseille, France

<sup>2</sup> CNRS, Aix Marseille Univ, IRD, Avignon Univ, IMBE, Marseille, France

Correspondence to: manon.rocco@univ-amu.fr

Supplementary materials

Supplementary figures:

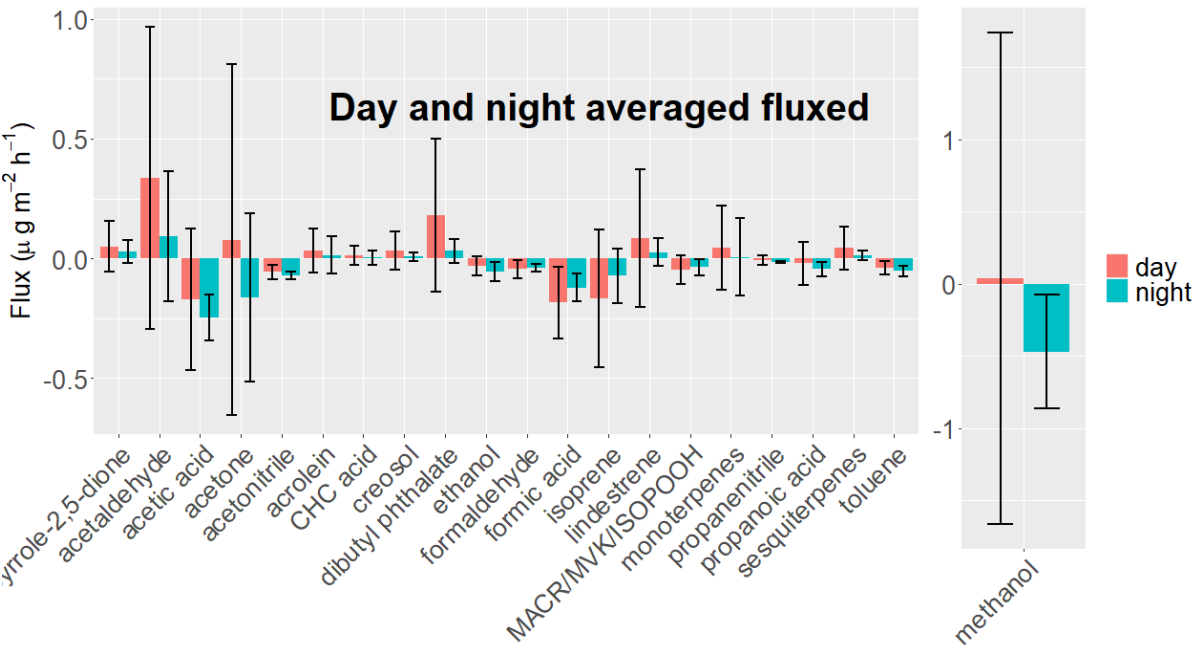

**Figure S.1.** Averaged fluxes including bare soil and all LM and their standard deviation (black lines) separated by day and night data.

Supplementary tables:

| Soil and litter humidity during the field campaign |        |                       |                          |     |                             |                               |             |                    |             |
|----------------------------------------------------|--------|-----------------------|--------------------------|-----|-----------------------------|-------------------------------|-------------|--------------------|-------------|
| Chamber                                            | Sample | Date flux VOC (dd/mm) | Date weight (dd/mm/yyyy) | Day | Dry Mass (DM)(g) empty tube | Fresh Mass (FM) (g) tube+soil | FM (g) soil | DM (g) tube + soil | DM (g) soil |
| Chamber 1 (bare soil)                              | Soil   | 23-24/05              | 24/5/2023                | J1  | 9.84                        | 17.15                         | 7.31        | 13.64              | 3.52        |
| Chamber 2                                          | Soil   | 23-24/05              | 24/5/2023                | J1  | 9.87                        | 19.94                         | 10.06       | 16.29              | 3.64        |
| Chamber 3                                          | Soil   | 23-24/05              | 24/5/2023                | J1  | 9.89                        | 22.34                         | 12.44       | 17.56              | 4.77        |
| Chamber 4                                          | Soil   | 23-24/05              | 24/5/2023                | J1  | 9.89                        | 25.03                         | 15.14       | 20.21              | 4.82        |
| Chamber 5                                          | Soil   | 23-24/05              | 24/5/2023                | J1  | 9.93                        | 23.54                         | 13.61       | 18.61              | 4.94        |
| Chamber 1 (bare soil)                              | Soil   | 24-25/05              | 25/5/2023                | J2  | 9.91                        | 21.24                         | 11.34       | 14.92              | 6.33        |

| Chamber 2             | Soil   | 24-25/05                    | 25/5/2023                       | J2  | 9.81                | 27.82            | 18.01             | 21.11                     | 6.72   |
|-----------------------|--------|-----------------------------|---------------------------------|-----|---------------------|------------------|-------------------|---------------------------|--------|
| Chamber 3             | Soil   | 24-25/05                    | 25/5/2023                       | J2  | 9.89                | 25.92            | 16.03             | 18.98                     | 6.94   |
| Chamber 4             | Soil   | 24-25/05                    | 25/5/2023                       | J2  | 9.88                | 25.43            | 15.54             | 19.48                     | 5.95   |
| Chamber 5             | Soil   | 24-25/05                    | 25/5/2023                       | J2  | 9.94                | 25.62            | 15.67             | 19.39                     | 6.22   |
| Chamber 1 (bare soil) | Soil   | 25-26/05                    | 26/5/2023                       | J3  | 9.87                | 22.75            | 12.87             | 16.48                     | 6.26   |
| Chamber 2             | Soil   | 25-26/05                    | 26/5/2023                       | J3  | 9.82                | 27.46            | 17.64             | 21.98                     | 5.48   |
| Chamber 3             | Soil   | 25-26/05                    | 26/5/2023                       | J3  | 9.83                | 26.12            | 16.29             | 18.95                     | 7.17   |
| Chamber 4             | Soil   | 25-26/05                    | 26/5/2023                       | J3  | 9.91                | 28.31            | 18.41             | 21.51                     | 6.81   |
| Chamber 5             | Soil   | 25-26/05                    | 26/5/2023                       | J3  | 9.73                | 24.64            | 14.91             | 19.04                     | 5.59   |
| Chamber               | Sample | Date flux<br>VOC<br>(dd/mm) | Date weight<br>(dd/mm/y<br>yyy) | Day | FM<br>(g)<br>litter | FM(g)<br>aliquot | DM (g)<br>aliquot | Litter<br>humidity<br>(%) | DM (g) |
| Chamber 2 - LM1       | Litter | 23-24/05                    | 24/5/2023                       | J1  | 8.88                | 7.99             | 6.684             | 16.43                     | 7.42   |
| Chamber 3 - LM2       | Litter |                             | 24/5/2023                       | J1  | 16.69               | 7.99             | 6.66              | 16.79                     | 13.88  |
| Chamber 4 - LM3       | Litter |                             | 24/5/2023                       | J1  | 30.1                | 8.01             | 6.91              | 13.79                     | 25.95  |
| Chamber 5 - LM4       | Litter |                             | 24/5/2023                       | J1  | 43.3                | 8.02             | 5.57              | 30.55                     | 30.07  |
| Chamber 2 - LM1       | Litter | 24-25/05                    | 25/5/2023                       | J2  | 7.10                | 7.09             | 4.24              | 40.22                     | 4.25   |
| Chamber 3 - LM2       | Litter |                             | 25/5/2023                       | J2  | 14.60               | 7.98             | 4.68              | 41.24                     | 8.58   |
| Chamber 4 - LM3       | Litter |                             | 25/5/2023                       | J2  | 31.70               | 8.08             | 6.66              | 17.57                     | 26.13  |
| Chamber 5 - LM4       | Litter |                             | 25/5/2023                       | J2  | 50.60               | 8.09             | 5.92              | 26.94                     | 36.97  |
| Chamber 2 - LM1       | Litter | 25-26/05                    | 26/5/2023                       | J3  | 8.00                | 3.60             | 3.08              | 14.41                     | 6.85   |
| Chamber 3 - LM2       | Litter |                             | 26/5/2023                       | J3  | 16.00               | 6.90             | 5.32              | 22.86                     | 12.34  |
| Chamber 4 - LM3       | Litter |                             | 26/5/2023                       | J3  | 32.00               | 8.00             | 6.33              | 20.94                     | 25.30  |
| Chamber 5 - LM4       | Litter |                             | 26/5/2023                       | J3  | 48.00               | 8.00             | 3.88              | 51.44                     | 23.31  |

**Table S.1.** Soil and litter fresh and dry masses (g), humidity inside the chambers during the field campaign experiment.

|                 |                                               |                  |                                                | Mean $\pm$ std ( $\mu\text{g m}^{-2} \text{h}^{-1}$ ) |                             |                             |                             |                             |
|-----------------|-----------------------------------------------|------------------|------------------------------------------------|-------------------------------------------------------|-----------------------------|-----------------------------|-----------------------------|-----------------------------|
| m/z             | Chemical<br>formula<br>(with H <sup>+</sup> ) | Name             | k ( $10^{-9}$<br>$\text{cm}^3 \text{s}^{-1}$ ) | Bare Soil                                             | LM 1                        | LM 2                        | LM 3                        | LM 4                        |
| m/z<br>31.01694 | C <sub>1</sub> H <sub>3</sub> O <sub>1</sub>  | formaldeh<br>yde | 3.169                                          | -0.043<br>0.046                                       | $\pm$ -0.030<br>$\pm$ 0.035 | $\pm$ -0.036<br>$\pm$ 0.039 | $\pm$ -0.031<br>$\pm$ 0.038 | $\pm$ -0.032<br>$\pm$ 0.035 |
| m/z<br>33.03393 | C <sub>1</sub> H <sub>5</sub> O <sub>1</sub>  | methanol         | 3.165                                          | -0.566<br>0.490                                       | $\pm$ -0.292<br>$\pm$ 0.412 | $\pm$ -0.220<br>$\pm$ 0.360 | $\pm$ 0.105<br>$\pm$ 1.790  | $\pm$ -0.162<br>$\pm$ 0.379 |

|                 |                                              |                                            |       |                 |   |                 |   |                 |   |                 |   |                 |   |
|-----------------|----------------------------------------------|--------------------------------------------|-------|-----------------|---|-----------------|---|-----------------|---|-----------------|---|-----------------|---|
| m/z<br>42.03758 | C <sub>2</sub> H <sub>4</sub> N              | acetonitril<br>e                           | 3.789 | -0.038<br>0.040 | ± | -0.038<br>0.040 | ± | -0.038<br>0.039 | ± | -0.038<br>0.040 | ± | -0.040<br>0.042 | ± |
| m/z<br>45.03087 | C <sub>2</sub> H <sub>5</sub> O              | acetaldehy<br>de                           | 3.125 | 0.173<br>0.206  | ± | 0.002<br>0.124  | ± | 0.336<br>0.181  | ± | -0.059<br>0.181 | ± | -0.066<br>0.084 | ± |
| m/z<br>47.01352 | CH <sub>3</sub> O <sub>2</sub>               | formic<br>acid                             | 2.353 | -0.090<br>0.104 | ± | -0.072<br>0.091 | ± | -0.088<br>0.101 | ± | -0.074<br>0.094 | ± | -0.088<br>0.103 | ± |
| m/z<br>47.04655 | C <sub>2</sub> H <sub>7</sub> O              | ethanol                                    | 3.131 | -0.023<br>0.031 | ± | -0.022<br>0.030 | ± | -0.022<br>0.030 | ± | -0.019<br>0.027 | ± | -0.023<br>0.030 | ± |
| m/z<br>53.03925 | C <sub>4</sub> H <sub>5</sub>                | cyclobutadiene or<br>butenyne              | 1.658 | -0.005<br>0.005 | ± | -0.004<br>0.005 | ± | -0.005<br>0.005 | ± | -0.004<br>0.005 | ± | -0.004<br>0.004 | ± |
| m/z<br>56.04845 | C <sub>3</sub> H <sub>6</sub> N              | propanenit<br>rile                         | 3.791 | -0.006<br>0.006 | ± | -0.005<br>0.006 | ± | -0.005<br>0.006 | ± | -0.005<br>0.006 | ± | -0.005<br>0.006 | ± |
| m/z<br>57.03024 | C <sub>3</sub> H <sub>5</sub> O              | acrolein                                   | 3.117 | 0.005<br>0.029  | ± | 0.014<br>0.037  | ± | 0.006<br>0.031  | ± | 0.009<br>0.038  | ± | 0.012<br>0.030  | ± |
| m/z<br>59.0493  | C <sub>3</sub> H <sub>7</sub> O              | acetone                                    | 3.122 | -0.213<br>0.215 | ± | -0.156 ± 0.73   |   | -0.048<br>0.084 | ± | 0.082<br>0.271  | ± | 0.194<br>0.251  | ± |
| m/z<br>60.05095 | C <sub>3</sub> H <sub>8</sub> O              | acetamide<br>(Sarkar et al., 2016)         | 3.124 | -0.008<br>0.008 | ± | -0.006<br>0.007 | ± | -0.003<br>0.004 | ± | 0.001<br>0.010  | ± | 0.006<br>0.008  | ± |
| m/z<br>61.02929 | C <sub>2</sub> H <sub>5</sub> O <sub>2</sub> | acetic acid                                | 2.349 | -0.098<br>0.118 | ± | -0.066<br>0.126 | ± | -0.112<br>0.120 | ± | -0.111<br>0.121 | ± | -0.061<br>0.091 | ± |
| m/z<br>62.02913 | CH <sub>4</sub> NO <sub>2</sub>              | nitrometha<br>ne<br>(Inomata et al., 2014) | 3.755 | -0.002<br>0.002 | ± | -0.001<br>0.002 | ± | -0.002<br>0.002 | ± | -0.002<br>0.002 | ± | -0.001<br>0.001 | ± |
| m/z<br>69.06937 | C <sub>5</sub> H <sub>9</sub>                | isoprene                                   | 1.838 | -0.075<br>0.116 | ± | -0.034<br>0.096 | ± | -0.056<br>0.094 | ± | -0.054<br>0.118 | ± | -0.025<br>0.086 | ± |
| m/z<br>70.07176 | C <sub>4</sub> H <sub>8</sub> N              | -                                          | 3.834 | -0.002<br>0.003 | ± | -0.001<br>0.003 | ± | -0.002<br>0.003 | ± | -0.002<br>0.003 | ± | -0.001<br>0.002 | ± |
| m/z<br>71.04503 | C <sub>4</sub> H <sub>7</sub> O              | MACR/M<br>VK/ISOP<br>OOH                   | 3.119 | -0.019<br>0.025 | ± | -0.012<br>0.019 | ± | -0.016<br>0.026 | ± | -0.015<br>0.026 | ± | -0.015<br>0.022 | ± |
| m/z<br>75.04034 | C <sub>3</sub> H <sub>7</sub> O <sub>2</sub> | propanoic<br>acid                          | 2.395 | -0.002<br>0.027 | ± | -0.014<br>0.015 | ± | -0.020<br>0.022 | ± | -0.006<br>0.022 | ± | -0.017<br>0.018 | ± |
| m/z<br>79.06013 | C <sub>6</sub> H <sub>7</sub>                | benzene                                    | 1.924 | -0.004<br>0.004 | ± | -0.004<br>0.004 | ± | -0.004<br>0.004 | ± | -0.004<br>0.004 | ± | -0.005<br>0.005 | ± |

|                 |                                                |                                              |       |                                                     |                                                     |                     |                                                    |                                                     |
|-----------------|------------------------------------------------|----------------------------------------------|-------|-----------------------------------------------------|-----------------------------------------------------|---------------------|----------------------------------------------------|-----------------------------------------------------|
|                 |                                                |                                              |       |                                                     |                                                     |                     |                                                    |                                                     |
| m/z<br>85.01845 | C <sub>4</sub> H <sub>5</sub> S                | thiophene                                    | 2.016 | -0.003 ±<br>0.004                                   | -0.003 ±<br>0.004                                   | -0.003 ±<br>0.005   | -0.003 ±<br>0.005                                  | -0.004 ±<br>0.005                                   |
| m/z<br>85.06795 | C <sub>5</sub> H <sub>9</sub> O                | cyclopentanone<br>(Mancuso et al., 2015)     | 3.122 | 0.001 ±<br>0.004                                    | -0.002 ±<br>0.003                                   | -0.001 ±<br>0.006   | 0.001 ±<br>0.003                                   | -4.375 10 <sup>-4</sup> ±<br>0.005                  |
| m/z<br>86.02312 | C <sub>3</sub> H <sub>4</sub> NO <sub>2</sub>  | cyanoacetic acid                             | 3.813 | -1.732 10 <sup>-4</sup> ±<br>2.774 10 <sup>-4</sup> | -1.734 10 <sup>-4</sup> ±<br>2.683 10 <sup>-4</sup> | 5.366E-03±<br>0.008 | 2.036 10 <sup>-4</sup> ±<br>2.905 10 <sup>-4</sup> | -2.169 10 <sup>-4</sup> ±<br>3.028 10 <sup>-4</sup> |
| m/z<br>87.04397 | C <sub>4</sub> H <sub>7</sub> O <sub>2</sub>   | 2,3-butanedione<br>(Sarkar et al., 2016)     | 2.446 | -0.005 ±<br>0.013                                   | -0.013 ±<br>0.014                                   | -0.011 ±<br>0.018   | -0.008 ±<br>0.011                                  | -0.013 ±<br>0.015                                   |
| m/z<br>87.08134 | C <sub>5</sub> H <sub>11</sub> O               | MBO                                          | 3.124 | 0.001 ±<br>0.002                                    | 2.40 10 <sup>-4</sup> ±<br>0.001                    | 0.002 ±<br>0.005    | 0.003 ±<br>0.005                                   | 0.001 ±<br>0.002                                    |
| m/z<br>93.07393 | C <sub>7</sub> H <sub>9</sub>                  | toluene                                      | 2.057 | -0.014 ±<br>0.014                                   | -0.012 ±<br>0.013                                   | -0.011 ±<br>0.012   | -0.013 ±<br>0.014                                  | -0.013 ±<br>0.014                                   |
| m/z<br>95.02947 | C <sub>2</sub> H <sub>7</sub> O <sub>4</sub>   | dioxybismethanol<br>(Meischner et al., 2022) | 3.122 | 0.007 ±<br>0.016                                    | -0.002 ±<br>0.003                                   | -0.001 ±<br>0.004   | 0.005 ±<br>0.011                                   | -0.002 ±<br>0.003                                   |
| m/z<br>97.03481 | C <sub>4</sub> H <sub>5</sub> N <sub>2</sub> O | -                                            | 3.025 | -0.002 ±<br>0.003                                   | -0.003 ±<br>0.003                                   | -0.003 ±<br>0.003   | -0.003 ±<br>0.003                                  | -0.003±<br>0.004                                    |
| m/z<br>98.02441 | C <sub>4</sub> H <sub>4</sub> NO <sub>2</sub>  | 1H-pyrrole-2,5-dione                         | 3.842 | -4.702 10 <sup>-4</sup> ±<br>±0.001                 | -4.878 10 <sup>-4</sup> ±<br>±0.001                 | 0.028 ±<br>0.004    | 0.017 ±<br>0.04                                    | -4.840 10 <sup>-4</sup> ±<br>0.001                  |
| m/z<br>99.05189 | C <sub>5</sub> H <sub>7</sub> O <sub>2</sub>   | -                                            | 2.507 | -0.003 ±<br>0.005                                   | -0.005 ±<br>0.007                                   | -0.004 ±<br>0.006   | -0.004 ±<br>0.007                                  | -0.005 ±<br>0.007                                   |
| m/z<br>100.0365 | C <sub>4</sub> H <sub>6</sub> NO <sub>2</sub>  | -                                            | 3.851 | -0.001 ±<br>0.001                                   | -0.001 ±<br>0.001                                   | 0.003 ±<br>0.004    | 0.002±<br>0.03                                     | -0.001±<br>0.001                                    |

|                 |                                               |                                                                   |       |                                                  |                                                  |                                   |                   |                                                  |
|-----------------|-----------------------------------------------|-------------------------------------------------------------------|-------|--------------------------------------------------|--------------------------------------------------|-----------------------------------|-------------------|--------------------------------------------------|
|                 |                                               |                                                                   |       |                                                  |                                                  |                                   |                   |                                                  |
| m/z<br>101.0686 | C <sub>5</sub> H <sub>9</sub> O <sub>2</sub>  | 2,3-Pentanedione or acetyl acetone or 2-butenic acid methyl ester | 2.523 | 0.011 ±<br>0.021                                 | 0.001 ±<br>0.009                                 | 0.024 ±<br>0.041                  | 0.012 ±<br>0.020  | 0.009 ±<br>0.020                                 |
| m/z<br>103.0410 | C <sub>4</sub> H <sub>7</sub> O <sub>3</sub>  | propylene Carbonate                                               | 3.111 | -0.003 ±<br>0.003                                | -0.003 ±<br>0.003                                | -0.002 ±<br>0.003                 | -0.003 ±<br>0.003 | -0.003 ±<br>0.003                                |
| m/z<br>107.0938 | C <sub>8</sub> H <sub>11</sub>                | xylenes                                                           | 2.182 | -0.002 ±<br>0.003                                | -0.003 ±<br>0.004                                | -0.003 ±<br>0.004                 | -0.003 ±<br>0.003 | -0.004 ±<br>0.004                                |
| m/z<br>111.0457 | C <sub>6</sub> H <sub>7</sub> O <sub>2</sub>  | -                                                                 | 2.572 | -0.002 ±<br>0.003                                | -0.004 ±<br>0.004                                | -0.004 ±<br>0.004                 | -0.002 ±<br>0.004 | -0.003 ±<br>0.004                                |
| m/z<br>113.0216 | C <sub>5</sub> H <sub>5</sub> O <sub>3</sub>  | -                                                                 | 3.121 | -0.002 ±<br>0.004                                | -0.004 ±<br>0.004                                | -0.004 ±<br>0.005                 | -0.003 ±<br>0.004 | -0.004 ±<br>0.004                                |
| m/z<br>115.0781 | C <sub>6</sub> H <sub>11</sub> O <sub>2</sub> | -                                                                 | 2.605 | 7.974×10 <sup>-4</sup> ± 0.003                   | -8.437 10 <sup>-4</sup> ± 0.002                  | 3.853 10 <sup>-4</sup> ± 0.002    | 0.003 ±<br>0.004  | -2.147 10 <sup>-4</sup> ± 0.003                  |
| m/z<br>116.0409 | C <sub>4</sub> H <sub>6</sub> NO <sub>3</sub> | 3-Methyl-2,5-oxazolidinone-dione                                  | 3.101 | -1.218 10 <sup>-4</sup> ± 3.445 10 <sup>-4</sup> | -2.168 10 <sup>-4</sup> ± 3.162 10 <sup>-4</sup> | 0.008 ±<br>0.012                  | 0.004 ±<br>0.005  | -2.448 10 <sup>-4</sup> ± 3.125 10 <sup>-4</sup> |
| m/z<br>129.098  | C <sub>7</sub> H <sub>13</sub> O <sub>2</sub> | cyclohexanecarboxylic acid - CHC acid                             | 2.685 | -4.928 10 <sup>-4</sup> ± 0.002                  | -6.588 10 <sup>-4</sup> ± 0.002                  | 0.008 ±<br>0.015                  | 0.003 ±<br>0.005  | -0.002 ±<br>0.003                                |
| m/z<br>129.1315 | C <sub>8</sub> H <sub>16</sub> O              | octanal or octanone or 1-octen-3-ol, ...                          | 2.175 | 0.003 ±<br>0.004                                 | 0.002 ±<br>0.003                                 | 6.275 10 <sup>-4</sup> ±<br>0.002 | 0.005 ±<br>0.008  | 0.002 ±<br>0.005                                 |
| m/z<br>137.1397 | C <sub>10</sub> H <sub>17</sub>               | monoterpenes                                                      | 2.433 | -0.007 ±<br>0.016                                | -0.007 ±<br>0.015                                | -0.007 ±<br>0.016                 | -0.006 ±<br>0.015 | 0.026 ±<br>0.043                                 |
| m/z<br>139.0844 | C <sub>8</sub> H <sub>11</sub> O <sub>2</sub> | p-cresol                                                          | 2.741 | 0.007 ±<br>0.013                                 | -7.802 10 <sup>-4</sup> ±<br>0.002               | 7.082 10 <sup>-4</sup> ±<br>0.002 | 0.003 ±<br>0.007  | 0.004 ±<br>0.014                                 |
| m/z<br>139.129  | C <sub>10</sub> H <sub>19</sub>               | -                                                                 | 2.453 | -0.002 ± 0.002                                   | -5.206 10 <sup>-4</sup> ±<br>0.002               | 3.961 10 <sup>-4</sup> ±<br>0.002 | 0.002 ±<br>0.003  | -0.003 ±<br>0.003                                |

|                 |                                                |                            |       |                                    |                                    |                                    |                  |                                                     |
|-----------------|------------------------------------------------|----------------------------|-------|------------------------------------|------------------------------------|------------------------------------|------------------|-----------------------------------------------------|
| m/z<br>153.1204 | C <sub>10</sub> H <sub>17</sub> O              | oxygenated<br>monoterpenes | 3.247 | -4.447 10 <sup>-4</sup> ±<br>0.002 | -5.383 10 <sup>-4</sup> ±<br>0.002 | 0.002 ±<br>0.002                   | 0.003 ±<br>0.003 | -0.002 ±<br>0.002                                   |
| m/z<br>157.1471 | C <sub>10</sub> H <sub>20</sub> O              | -                          | 3.946 | 0.003 ±<br>0.005                   | 2.378 10 <sup>-4</sup> ±<br>0.003  | -4.986 10 <sup>-4</sup> ±<br>0.004 | 0.001 ±<br>0.004 | -0.002 ±<br>0.004                                   |
| m/z<br>205.1848 | C <sub>15</sub> H <sub>25</sub>                | sesquiterpenes             | 2.909 | 4.282 10 <sup>-5</sup> ±<br>0.002  | 0.002 ±<br>0.002                   | 0.006 ±<br>0.016                   | 0.007 ±<br>0.008 | 6.952 10 <sup>-4</sup> ±<br>0.002                   |
| m/z<br>215.1319 | C <sub>15</sub> H <sub>19</sub> O              | lindestrene                | 3.493 | 0.002 ±<br>0.003                   | 0.003 ±<br>0.007                   | 0.025 ±<br>0.054                   | 0.002 ±<br>0.004 | -5.369 10 <sup>-4</sup> ±<br>8.963 10 <sup>-4</sup> |
| m/z<br>279.1614 | C <sub>16</sub> H <sub>23</sub> O <sub>4</sub> | dibutyl<br>phthalate       | 3.805 | -0.003 ±<br>0.005                  | 0.007 ±<br>0.021                   | 0.008 ±<br>0.017                   | 0.013 ±<br>0.022 | 0.008 ±<br>0.021                                    |

15 **Table S.2.** VOCs targeted in our study and mean fluxes ± std in each chamber with bare soil, LM 1, 2, 3, 4.
